# Supplementary material for: Screening and follow-up care for cognitive and emotional problems after transient ischaemic attack and ischaemic stroke: a national, cross-sectional, online survey among neurologists in the Netherlands
Source: PubMed Central journal article supplement — BMJ Open. 2021 Aug 12;11(8):e046316. doi: 10.1136/bmjopen-2020-046316 (PMC8362736; doi:10.1136/bmjopen-2020-046316), 2021-08-12
Supplement: bmjopen-2020-046316.draft_revisions.pdf [file bmjopen-2020-046316.draft_revisions.pdf]

# BMJ Open

BMJ Open is committed to open peer review. As part of this commitment we make the peer review history of every article we publish publicly available.

When an article is published we post the peer reviewers' comments and the authors' responses online. We also post the versions of the paper that were used during peer review. These are the versions that the peer review comments apply to.

The versions of the paper that follow are the versions that were submitted during the peer review process. They are not the versions of record or the final published versions. They should not be cited or distributed as the published version of this manuscript.

BMJ Open is an open access journal and the full, final, typeset and author-corrected version of record of the manuscript is available on our site with no access controls, subscription charges or pay-per-view fees (<http://bmjopen.bmj.com>).

If you have any questions on BMJ Open's open peer review process please email [info.bmjopen@bmj.com](mailto:info.bmjopen@bmj.com)

# BMJ Open

## Screening and follow-up care for cognitive and emotional problems after TIA and ischemic stroke: a national survey among neurologists in the Netherlands

|                               |                                                                                                                                                                                                                                                                                                                                                                                                                                                                                                                                                                   |
|-------------------------------|-------------------------------------------------------------------------------------------------------------------------------------------------------------------------------------------------------------------------------------------------------------------------------------------------------------------------------------------------------------------------------------------------------------------------------------------------------------------------------------------------------------------------------------------------------------------|
| Journal:                      | <i>BMJ Open</i>                                                                                                                                                                                                                                                                                                                                                                                                                                                                                                                                                   |
| Manuscript ID                 | bmjopen-2020-046316                                                                                                                                                                                                                                                                                                                                                                                                                                                                                                                                               |
| Article Type:                 | Original research                                                                                                                                                                                                                                                                                                                                                                                                                                                                                                                                                 |
| Date Submitted by the Author: | 26-Oct-2020                                                                                                                                                                                                                                                                                                                                                                                                                                                                                                                                                       |
| Complete List of Authors:     | Slenders, Jos; OLVG, Neurology<br>Van den Berg-Vos, RM; OLVG, Neurology; Amsterdam UMC Locatie AMC, Neurology<br>Visser-Meily, Johanna; UMC Utrecht Brain Center Rudolf Magnus, Department of Rehabilitation, Physical Therapy Science & Sports; UMC Utrecht Brain Center Rudolf Magnus, Center of Excellence for Rehabilitation Medicine<br>van Heugten, Caroline M.; Maastricht University, Department of Neuropsychology & Psychopharmacology; Maastricht University Medical Centre+, School for Mental Health & Neuroscience<br>Kwa, Vincent; OLVG, Neurology |
| Keywords:                     | Stroke < NEUROLOGY, Organisation of health services < HEALTH SERVICES ADMINISTRATION & MANAGEMENT, REHABILITATION MEDICINE, Depression & mood disorders < PSYCHIATRY                                                                                                                                                                                                                                                                                                                                                                                              |
|                               |                                                                                                                                                                                                                                                                                                                                                                                                                                                                                                                                                                   |

SCHOLARONE™  
Manuscripts

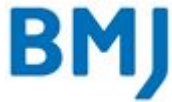

I, the Submitting Author has the right to grant and does grant on behalf of all authors of the Work (as defined in the below author licence), an exclusive licence and/or a non-exclusive licence for contributions from authors who are: i) UK Crown employees; ii) where BMJ has agreed a CC-BY licence shall apply, and/or iii) in accordance with the terms applicable for US Federal Government officers or employees acting as part of their official duties; on a worldwide, perpetual, irrevocable, royalty-free basis to BMJ Publishing Group Ltd ("BMJ") its licensees and where the relevant Journal is co-owned by BMJ to the co-owners of the Journal, to publish the Work in this journal and any other BMJ products and to exploit all rights, as set out in our [licence](#).

The Submitting Author accepts and understands that any supply made under these terms is made by BMJ to the Submitting Author unless you are acting as an employee on behalf of your employer or a postgraduate student of an affiliated institution which is paying any applicable article publishing charge ("APC") for Open Access articles. Where the Submitting Author wishes to make the Work available on an Open Access basis (and intends to pay the relevant APC), the terms of reuse of such Open Access shall be governed by a Creative Commons licence – details of these licences and which [Creative Commons](#) licence will apply to this Work are set out in our licence referred to above.

Other than as permitted in any relevant BMJ Author's Self Archiving Policies, I confirm this Work has not been accepted for publication elsewhere, is not being considered for publication elsewhere and does not duplicate material already published. I confirm all authors consent to publication of this Work and authorise the granting of this licence.

1  
2  
3 **1 Screening and follow-up care for cognitive and emotional problems after TIA and**  
4  
5  
6 **2 ischemic stroke: a national survey among neurologists in the Netherlands**  
7  
8

9  
10 3 J.P.L. Slenders<sup>1</sup>, R.M. Van den Berg-Vos<sup>1,2</sup>, J.M.A. Visser-Meily<sup>3,4</sup>, C.M. van Heugten<sup>5,6</sup>,  
11  
12 4 V.I.H. Kwa<sup>1</sup>  
13  
14  
15  
16

17  
18 6 1. Department of Neurology, OLVG, Amsterdam, the Netherlands  
19

20 7 2. Department of Neurology, Amsterdam UMC, the Netherlands  
21

22 8 3. Department of Rehabilitation, Physical Therapy Science & Sports, UMC Utrecht Brain  
23  
24 9 Center, University Medical Center Utrecht, the Netherlands  
25

26  
27 10 4. Center of Excellence for Rehabilitation Medicine, UMC Utrecht Brain Center, University  
28  
29 11 Medical Center Utrecht, and De Hoogstraat Rehabilitation, Utrecht, the Netherlands  
30

31 12 5. Department of Neuropsychology & Psychopharmacology – Maastricht University, the  
32  
33 13 Netherlands  
34

35  
36 14 6. School for Mental Health & Neuroscience – Maastricht University Medical Center, the  
37  
38 15 Netherlands  
39

40  
41  
42  
43  
44 **17 Corresponding author:**  
45

46 18 J.P.L. Slenders  
47

48  
49 19 [j.p.l.slenders@olvg.nl](mailto:j.p.l.slenders@olvg.nl)  
50

51 20 0031 20 510 8802  
52

53 21 Department of Neurology - OLVG  
54

55  
56 22 Jan Tooropstraat 164  
57

58 23 1061AE Amsterdam, The Netherlands  
59  
60

1  
2  
3  
4  
5  
6  
7  
8  
9  
10  
11  
12  
13  
14  
15  
16  
17  
18  
19  
20  
21  
22  
23  
24  
25  
26  
27  
28  
29  
30  
31  
32  
33  
34  
35  
36  
37  
38  
39  
40  
41  
42  
43  
44  
45  
46  
47  
48  
49  
50  
51  
52  
53  
54  
55  
56  
57  
58  
59  
60

- 24 Total number of tables: 3
- 25 Total number of figures: not applicable
- 26 Word count: [2360/4000]

For peer review only

1  
2  
3 **Abstract**  
4  
5

6 **Background:** After stroke, many patients experience cognitive and/or emotional problems.  
7  
8  
9 While national guidelines recommend screening for these problems, actual screening rates  
10  
11 might be limited.  
12  
13

14 **Objective:** This study aimed to examine the clinical practice at neurology departments  
15  
16 regarding screening, information provision and follow-up care for cognitive and emotional  
17  
18 problems after TIA and ischemic stroke.  
19  
20  
21

22 **Methods:** A nationwide, cross-sectional, online survey was conducted between October 2018  
23  
24 and October 2019 among neurologists in all hospitals in the Netherlands.  
25  
26  
27

28 **Results:** Neurologists in 78 hospitals were invited to join the survey, and 52 (67%) of them  
29  
30 completed it. Thirty-one (59%) neurologists reported that screening for cognitive problems  
31  
32 after TIA and ischemic stroke was mostly or always performed. When cognitive screening  
33  
34 was performed, 42 (84%) used validated screening instruments. Twenty-nine (56%) of the  
35  
36 respondents reported that screening for emotional problems was mostly or always performed.  
37  
38 When emotional screening was performed, 31 (63%) reported using validated screening  
39  
40 instruments. Timing of screening and information provision was highly variable, and the  
41  
42 majority reported that there was no protocol for follow-up care when cognitive or emotional  
43  
44 problems were found.  
45  
46  
47  
48

49 **Conclusions:** This study demonstrates that clinical practice at neurology departments is  
50  
51 highly variable regarding screening, information provision and follow-up care for cognitive  
52  
53 and emotional problems in patients after TIA or ischemic stroke. Approximately half of the  
54  
55 participating neurologists reported that screening was performed only sometimes or never for  
56  
57 cognitive and emotional problems after TIA and ischemic stroke.  
58  
59  
60

1  
2  
3 50  
4  
5  
67 **51 Keywords**8  
9  
10 52 Screening, cognition, depression and anxiety, stroke, rehabilitation, survey  
11  
1213 53  
14  
1516 **54 Strengths and limitations of this study**  
17  
18

- 19 55 • A detailed overview is provided of the current clinical practice at neurology  
20  
21 56 departments with regard to screening for cognitive and emotional problems after TIA  
22  
23 57 or ischemic stroke.  
24  
25 58 • Multiple opportunities are identified to further optimize the clinical practice of  
26  
27 59 screening and care for cognitive and emotional problems after stroke.  
28  
29 60 • Neurologists in all Dutch hospitals were invited to participate and a satisfactory  
30  
31 61 percentage completed the survey.  
32  
33 62 • Being a survey study, the results might deviate from the actual clinical practice, for  
34  
35 63 example due to social desirability.  
36  
37 64 • This study focuses on the views of neurologists and their teams, which might  
38  
39 65 underestimate the true screening rates for cognitive and emotional problems.  
40  
41  
42  
43  
44  
45

46 66  
47  
4849 **67 Introduction**  
50  
51

52 68 Stroke is a leading cause of disability worldwide.(1) After stroke, many patients experience  
53  
54 69 cognitive and/or emotional problems,(2-6) which affect their quality of life and  
55  
56 70 participation.(7-11) Therefore, national guidelines recommend screening and care for  
57  
58 71 cognitive and emotional problems after stroke.(12-15) The Dutch guideline recommends

1  
2  
3 72 screening all stroke patients for cognitive problems, using the Montreal Cognitive Assessment  
4  
5 73 (MoCA) rather than the Mini Mental State Examination (MMSE), and referral to  
6  
7 74 rehabilitation services when cognitive problems are present.(15) With regard to emotional  
8  
9  
10 75 problems, multiple screening instruments are considered suitable, namely the Hospital  
11  
12 76 Anxiety and Depression Scale (HADS), the Beck Depression Inventory (BDI), the Symptom  
13  
14 77 CheckList (SCL-90) subscale for depression, and the Hamilton Depression Scale (HDS).(15)  
15  
16  
17 78 When emotional problems are present, psychotherapy or pharmacotherapy should be  
18  
19 79 considered.(15) Previous studies in the United Kingdom found that compliance with the  
20  
21 80 guidelines is low as regards screening for cognitive and emotional problems after transient  
22  
23 81 ischemic attack (TIA) and ischemic stroke.(16, 17) In the Netherlands, in general, stroke  
24  
25 82 patients are admitted to a stroke unit in the acute phase, where a neurologist functions as  
26  
27 83 treating physician. From the stroke unit, patients are discharged home, to a rehabilitation  
28  
29 84 centre or to a nursing home. If patients are discharged home, they are followed-up at the  
30  
31 85 outpatient clinics of the neurology department.

32  
33  
34  
35  
36 86 This study aimed to investigate the current clinical practice of screening for cognitive and  
37  
38 87 emotional problems after TIA and ischemic stroke at neurology departments in hospitals in  
39  
40 88 the Netherlands. This study examined: (1) if patients with TIA or ischemic stroke are screened  
41  
42 89 for cognitive and emotional problems, (2) if so, which screening instruments are used, (3)  
43  
44 90 when screening is performed, (4) whether patients receive information regarding the presence  
45  
46 91 and nature of cognitive and emotional problems and (5) what kind of follow-up care is  
47  
48 92 delivered when cognitive and/or emotional problems are present.

49  
50  
51  
52  
53 93

## 54 55 56 94 **Materials and Methods**

### 57 58 59 95 *Study design and participants*



1  
2  
3 96 A nationwide, cross-sectional, online survey was conducted in the Netherlands between  
4  
5 97 October 2018 and October 2019. Neurologists in all Dutch hospitals with an inpatient  
6  
7 98 neurology ward were invited to participate in this survey. For every neurology department,  
8  
9  
10 99 one neurologist with experience of stroke care was asked to complete the survey about  
11  
12 100 screening and care for cognitive and emotional problems after TIA and ischemic stroke at  
13  
14 101 their department. The neurologist was allowed to forward the survey to another neurologist, a  
15  
16 102 nurse practitioner or a physician assistant within the same department with experience of  
17  
18 103 stroke after-care.  
19  
20  
21

22 104 The data supporting the findings of this study are available from the corresponding author  
23  
24 105 upon reasonable request. Ethical approval for this study was waived by the local ethics  
25  
26 106 committee of OLVG Amsterdam. All data were handled in accordance with the  
27  
28 107 EU General Data Protection Regulation 2016/679.  
29  
30  
31

32 108

### 36 109 *Development and content of the survey*

37  
38  
39 110 The survey was developed by a multidisciplinary team, including a clinical  
40  
41 111 neuropsychologist, a rehabilitation physician, two vascular stroke neurologists and a resident  
42  
43 112 in neurology. A data manager verified the content and structure after the survey had been built  
44  
45 113 in the web-based system Castor EDC.(18)  
46  
47  
48

49 114 The survey was divided into two parts: one part about screening and follow-up care for  
50  
51 115 cognitive consequences after TIA and ischemic stroke, and the second part about screening  
52  
53 116 and follow-up care for emotional consequences. Both parts included 10 multiple choice  
54  
55 117 questions, resulting in 20 questions in total (see Table 2 and Table 3). The number of answer  
56  
57 118 options ranged from two to nine. The multiple choice questions were formatted either as  
58  
59  
60

1  
2  
3 119 single-answer multiple choice questions (only one answer allowed) or as multiple-answer  
4  
5 120 multiple choice questions (multiple answers allowed).  
6  
7  
8

9 121

### 12 122 *Survey administration*

15 123 All neurologists received an invitation by email to participate in this online survey. Non-  
16  
17 124 respondents received up to two subsequent emails. If the questionnaire was not completed  
18  
19 125 after invitation by email, the neurologist was contacted by telephone. Participants completed  
20  
21 126 the survey independently online, using a computer. Data were collected anonymously.  
22  
23  
24

25 127

### 29 128 *Statistical analysis*

32 129 The results of the survey were analysed using descriptive statistics. For single-answer  
33  
34 130 multiple choice questions, all answer options were recorded as percentages of the total  
35  
36 131 number of respondents. For multiple-answer multiple choice questions the following analysis  
37  
38 132 was performed. First, a dichotomous dummy variable was computed for each potential answer  
39  
40 133 option. The options of the dummy variables were 'marked' or 'not marked' for each answer  
41  
42 134 option. All answer options were then recorded as percentages of 'marked', divided by the  
43  
44 135 total number of respondents. IBM SPSS version 22.0 was used for analyses.  
45  
46  
47

48 136

### 52 137 *Patient and public involvement*

55 138 Patients or the public were not involved in the design, conduct or reporting of this research.  
56  
57  
58

59 139  
60

## 140 **Results**

### 141 *Response rate and characteristics of the participants*

142 Of the neurologists in 78 Dutch hospitals who were invited to join the survey, 52 (67%)  
143 completed the survey. The characteristics of the respondents are shown in Table 1. Nineteen  
144 (37%) participants were female, and the median age was 45 years (interquartile range: 40 –  
145 57); seven (15%) were working at a university hospital, 44 (87%) in a large general hospital  
146 (more than 100 stroke patients per year) and one (2%) in a small general hospital (less than  
147 100 stroke patients per year). Of the non-respondents, one (4%) was working at a university  
148 hospital, 25 (96%) at a large general hospital and none at a small general hospital.

### 150 *Screening for cognitive problems after TIA and ischemic stroke*

151 The various items regarding screening for cognitive problems in patients after TIA or  
152 ischemic stroke are shown in Table 2. Of the respondents, 31 (59%) reported that patients  
153 were mostly or always screened for cognitive problems after TIA or ischemic stroke, while 21  
154 (41%) said that patients were sometimes or never screened. When screening for cognitive  
155 problems was performed, 42 (84%) stated that validated screening instruments were used.  
156 When screening instruments were used, the most commonly used instruments were the MoCA  
157 (n = 35; 84%), the Mini-Mental State Examination (MMSE) (n = 21; 50%) and the Checklist  
158 for Cognitive and Emotional Consequences following Stroke (CLCE-24) (n = 6; 14%). The  
159 timing of screening for cognitive problems varied greatly among the hospitals: 31 (62%)  
160 screened during hospital admission and 19 (38%) at a follow-up visit between 4-8 weeks after  
161 TIA or ischemic stroke. Fourteen (27%) stated that they screened at multiple time points.  
162 According to the participants, the majority of patients received some form of information  
163 about possible cognitive problems after TIA or ischemic stroke during admission or at follow-

1  
2  
3 164 up visits, but 19 (37%) reported that no written information was provided at all. When  
4  
5 165 cognitive problems were observed, it was the local neurologist, nurse practitioner or physician  
6  
7 166 assistant, or the rehabilitation physician, who acted as the treating physician in most cases.  
8  
9  
10 167 Thirty-nine of the participants (75%) stated that they did not have a guideline or protocol for  
11  
12 168 follow-up care in case of cognitive problems after TIA and ischemic stroke. The reasons for  
13  
14 169 referral to specialized care varied considerably among the hospitals: 36 (69%) referred  
15  
16 170 patients based on cognitive complaints, 36 (69%) based on cognitive disorders, 30 (58%)  
17  
18 171 based on positive screening results and 14 (27%) based on deviant results during a  
19  
20 172 neuropsychological examination.  
21  
22  
23  
24  
25 173

#### 28 174 *Screening for emotional problems after TIA and ischemic stroke*

30  
31 175 Table 3 shows the survey responses for the items about screening for emotional problems.  
32  
33 176 According to 29 (56%) of the participants, patients were mostly or always screened for  
34  
35 177 emotional problems after TIA or ischemic stroke at their hospital. When patients were  
36  
37 178 screened, 31 (63%) used validated screening instruments. When screening instruments were  
38  
39 179 used, the most commonly used instrument was the Hospital Anxiety and Depression Scale  
40  
41 180 (HADS) (n = 27; 87%). Screening for emotional problems was performed at variable time  
42  
43 181 points, but mostly during hospital admission (n = 14; 29%) or at a follow-up visit between 1 –  
44  
45 182 4 weeks after discharge (n = 21; 43%). Fifteen percent of the participants reported that  
46  
47 183 patients were screened at multiple time points. According to 22 (61%) of the participants,  
48  
49 184 information about the possible emotional sequelae was given to most or all patients, and  
50  
51 185 according to 21 (40%), written information was mostly or always given. According to the  
52  
53 186 respondents, 42 (81%) of the hospitals had no guideline or protocol for follow-up care for  
54  
55 187 emotional problems after TIA and ischemic stroke. When emotional problems arose, it was  
56  
57  
58  
59  
60

1  
2  
3 188 mostly the neurologist who acted as the treating physician (n = 30; 58%), followed by the  
4  
5 189 nurse practitioner or physician assistant (n = 27; 52%), the rehabilitation physician (n = 23;  
6  
7 190 44%) or the patient's general practitioner (n = 16; 31%). Indications for referral to specialized  
8  
9 191 care were emotional complaints (n = 37; 71%), clinical suspicion of an emotional disorder (n  
10  
11 = 31; 60%) and positive screening results (n = 14; 27%).  
12  
13  
14  
15  
16 193

17

## 18 194 **Discussion**

19  
20  
21 195 Our nationwide survey in the Netherlands found a wide variety as regards screening at  
22  
23 196 neurology departments for cognitive and emotional problems in patients after TIA or ischemic  
24  
25 197 stroke. While a small majority of the participants reported screening for cognitive and  
26  
27 198 emotional problems was performed in most or all patients with TIA or ischemic stroke, the  
28  
29 199 others did so only sometimes, or never. When patients were screened, the most commonly  
30  
31 200 used instruments for cognitive problems were the MoCA and the MMSE, and for emotional  
32  
33 201 problems the HADS. Screening for cognitive and emotional problems was performed at  
34  
35 202 various time points, and information provision was highly variable. The vast majority of  
36  
37 203 respondents indicated that their hospital lacked a protocol or a guideline for follow-up care for  
38  
39 204 cognitive and emotional problems after stroke.  
40  
41  
42  
43  
44

45 205 A strength of this study is that neurologists in all Dutch hospitals with a neurology ward were  
46  
47 206 invited to participate, and that a satisfactory percentage of invited clinicians actually  
48  
49 207 completed the survey. A limitation of this study is its design as a survey, which might not  
50  
51 208 accurately reflect current clinical practice, for example due to social desirability. In addition,  
52  
53 209 we focused on the views of the neurologists and their teams. This might underestimate the  
54  
55 210 true screening rates for cognitive and emotional problems, since part of this care might be  
56  
57 211 provided by, for example, general practitioners or rehabilitation physicians.  
58  
59  
60

1  
2  
3 212 National guidelines recommend screening for cognitive and emotional problems in all stroke  
4  
5 213 patients. Nevertheless, almost half of the respondents reported that they only sometimes, or  
6  
7 214 even never, screened patients for cognitive and emotional problems after TIA or ischemic  
8  
9 215 stroke, which is in accordance with the findings of other studies.(12-17, 19) Previous studies  
10  
11 216 found considerable practice variation for other aspects of stroke care as well, such as  
12  
13 217 secondary prevention and mobilization after stroke.(20, 21) Studies have identified multiple  
14  
15 218 barriers to the implementation of evidence-based guidelines in clinical practice.(22, 23) With  
16  
17 219 regard to screening for cognitive and emotional problems after stroke, multiple factors might  
18  
19 220 explain the low rates of routine screening. First, there are numerous screening tools for  
20  
21 221 cognitive and emotional problems, and they can be time-consuming and may be difficult to  
22  
23 222 use for patients with language barriers or disabilities such as aphasia, hearing loss or vision  
24  
25 223 loss.(24) Second, insufficient time, training and expertise of clinicians might further limit  
26  
27 224 routine screening, as well as the lack of a protocol for follow-up care when a screening turns  
28  
29 225 out to be positive.(19, 22-24) Third, stroke care predominantly focuses on secondary  
30  
31 226 prevention, which might overshadow the importance of screening for cognitive and emotional  
32  
33 227 problems.

34  
35 228 Remarkably, when screening for cognitive problems was performed, 50% of our respondents  
36  
37 229 who used screening instruments reported using the MMSE. However, two reviews have  
38  
39 230 demonstrated that the MMSE is not sufficiently sensitive to the cognitive consequences of  
40  
41 231 stroke, as it was originally designed to screen for the presence of dementia.(15, 25, 26) It is  
42  
43 232 recommended to use the MoCA as a screening instrument for cognitive disorders in patients  
44  
45 233 with stroke.(15, 26) When patients were screened for emotional problems after stroke, the  
46  
47 234 vast majority of the respondents said they used the HADS, as has been recommended.(15)

48  
49  
50  
51  
52 235 Apart from screening, information provision and follow-up care for cognitive and emotional  
53  
54  
55 236 problems were also highly variable in our study, and most respondents reported that a

1  
2  
3 237 protocol for follow-up care was lacking. Nonetheless, cognitive and emotional problems are  
4  
5 238 very common after stroke, and a previous evaluation among patients identified information  
6  
7 239 provision after stroke as a major target for improvement.(27) Moreover, patients' evaluations  
8  
9 240 underline the importance of the cognitive and emotional sequelae, and patients even rated  
10  
11 241 these consequences as among the top 10 of research priorities in stroke.(28) Fortunately,  
12  
13 242 attention is increasingly being drawn to the cognitive and emotional consequences of stroke,  
14  
15 243 and screening rates seem to be increasing.(29) Still, our results suggest that further  
16  
17 244 improvement is possible and, in our opinion, desirable. Therefore, we recommend to perform  
18  
19 245 screening for all patients after stroke for cognitive and emotional problems with validated  
20  
21 246 screening instruments such as the MoCA and HADS, respectively. In our opinion, the  
22  
23 247 additional use of stroke-specific patient-reported screening instruments that measure  
24  
25 248 subjective cognitive complaints and a wider spectrum of emotional problems will provide  
26  
27 249 even better and valuable insights into the consequences of stroke. An example of such an  
28  
29 250 instrument is the Checklist for the Detection of Cognitive and Emotional Consequences After  
30  
31 251 Stroke (CLCE-24). Additionally, we recommend that such screenings should be performed  
32  
33 252 by health care professionals with experience in screening for cognitive and emotional  
34  
35 253 problems, and with sufficient time to use appropriate screening instruments. In our opinion,  
36  
37 254 these screenings can be performed in primary care, in hospitals or in rehabilitation centres.  
38  
39 255 However, to ensure that all patients are actually screened, it is important to have clear  
40  
41 256 agreements embedded in the collaborative network of stroke care. Furthermore, guidance for  
42  
43 257 stroke patients with proven cognitive and emotional problems can be further optimized by  
44  
45 258 implementing local protocols for follow-up care. Follow-up care for cognitive problems can  
46  
47 259 include referral to a rehabilitation physician for treatment such as cognitive rehabilitation.(30)  
48  
49 260 With regard to follow-up care for emotional problems, psycho-education, psychotherapy and  
50  
51 261 pharmacotherapy can be considered.(15)  
52  
53  
54  
55  
56  
57  
58  
59  
60

1  
2  
3 262 In conclusion, this study indicates that stroke care practice at neurology departments in the  
4  
5 263 Netherlands is highly variable with regard to screening, information provision and follow-up  
6  
7 264 care for cognitive and emotional problems in patients after TIA or ischemic stroke. Almost  
8  
9 265 half of the respondents reported that they only sometimes or never screened for cognitive and  
10  
11 266 emotional problems after TIA and stroke. Therefore, in order to optimize stroke care,  
12  
13 267 screening rates should be improved and should include suitable screening instruments and a  
14  
15 268 protocol for follow-up care.  
16  
17  
18  
19  
20  
21  
22  
23  
24  
25  
26  
27  
28  
29  
30  
31  
32  
33  
34  
35  
36  
37  
38  
39  
40  
41  
42  
43  
44  
45  
46  
47  
48  
49  
50  
51  
52  
53  
54  
55  
56  
57  
58  
59  
60

For peer review only



1  
2  
3 269 **Acknowledgements:**  
4  
5

6 270 We would like to thank all participants for their contributions to this study.  
7  
8

9 271  
10  
11

12 272 **Declarations**  
13  
14

15 273 Conflicting interests: The authors declare that they have no competing interests  
16  
17

18 274 Funding: This work was supported by ZonMw, programme Efficiency Studies; project  
19  
20  
21 275 number 843004122.  
22  
23

24 276 Informed consent: Informed consent was not sought for this study because participants were  
25  
26 277 not subjected to procedures and because the questions were not regarded as confrontational or  
27  
28 278 time-consuming.  
29  
30

31  
32 279 Ethical approval: Ethical approval for this study was waived by the local ethics committee of  
33  
34 280 OLVG Amsterdam. This study was completed in accordance with the Helsinki Declaration as  
35  
36 281 revised in 2013.  
37  
38

39 282 Data availability statement: The data that support the findings of this study are available from  
40  
41 283 the corresponding author upon reasonable request.  
42  
43  
44

45 284 Contributorship: RvdB, CH, VK, JS and AV were involved in the conception of the study  
46  
47 285 design. RvdB, VK and JS were involved in participant recruitment. JS was involved in  
48  
49 286 researching the literature, gaining ethical approval and data analysis. JS wrote the first draft of  
50  
51 287 the manuscript. All authors reviewed and edited the manuscript and approved the final version  
52  
53 288 of the manuscript.  
54  
55  
56  
57  
58  
59  
60

289 **References**

- 290 1. Feigin VL, Forouzanfar MH, Krishnamurthi R, Mensah GA, Connor M, Bennett DA, et al. Global  
291 and regional burden of stroke during 1990-2010: findings from the Global Burden of Disease Study  
292 2010. *Lancet*. 2014;383(9913):245-54.
- 293 2. Moran GM, Fletcher B, Feltham MG, Calvert M, Sackley C, Marshall T. Fatigue, psychological  
294 and cognitive impairment following transient ischaemic attack and minor stroke: a systematic review.  
295 *Eur. J. Neurol*. 2014;21(10):1258-67.
- 296 3. van Rijsbergen MW, Mark RE, de Kort PL, Sitskoorn MM. Subjective cognitive complaints  
297 after stroke: a systematic review. *J. Stroke Cerebrovasc. Dis*. 2014;23(3):408-20.
- 298 4. Campbell Burton CA, Murray J, Holmes J, Astin F, Greenwood D, Knapp P. Frequency of  
299 anxiety after stroke: a systematic review and meta-analysis of observational studies. *Int. J. Stroke*.  
300 2013;8(7):545-59.
- 301 5. Sexton E, McLoughlin A, Williams DJ, Merriman NA, Donnelly N, Rohde D, et al. Systematic  
302 review and meta-analysis of the prevalence of cognitive impairment no dementia in the first year  
303 post-stroke. *Eur. Stroke J*. 2019;4(2):160-71.
- 304 6. Hackett ML, Pickles K. Part I: frequency of depression after stroke: an updated systematic  
305 review and meta-analysis of observational studies. *Int. J. Stroke*. 2014;9(8):1017-25.
- 306 7. de Graaf JA, van Mierlo ML, Post MWM, Achterberg WP, Kappelle LJ, Visser-Meily JMA. Long-  
307 term restrictions in participation in stroke survivors under and over 70 years of age. *Disabil. Rehabil*.  
308 2018;40(6):637-45.
- 309 8. Rafsten L, Danielsson A, Sunnerhagen KS. Anxiety after stroke: A systematic review and meta-  
310 analysis. *J. Rehabil. Med*. 2018;50(9):769-78.
- 311 9. De Wit L, Theuns P, Dejaeger E, Devos S, Gantenbein AR, Kerckhofs E, et al. Long-term impact  
312 of stroke on patients' health-related quality of life. *Disabil. Rehabil*. 2017;39(14):1435-40.
- 313 10. Babulal GM, Huskey TN, Roe CM, Goette SA, Connor LT. Cognitive impairments and mood  
314 disruptions negatively impact instrumental activities of daily living performance in the first three  
315 months after a first stroke. *Top. Stroke Rehabil*. 2015;22(2):144-51.
- 316 11. van der Zee CH, Visser-Meily JM, Lindeman E, Jaap Kappelle L, Post MW. Participation in the  
317 chronic phase of stroke. *Top. Stroke Rehabil*. 2013;20(1):52-61.
- 318 12. Holloway RG, Arnold RM, Creutzfeldt CJ, Lewis EF, Lutz BJ, McCann RM, et al. Palliative and  
319 end-of-life care in stroke: a statement for healthcare professionals from the American Heart  
320 Association/American Stroke Association. *Stroke*. 2014;45(6):1887-916.
- 321 13. Winstein CJ, Stein J, Arena R, Bates B, Chorney LR, Cramer SC, et al. Guidelines for Adult  
322 Stroke Rehabilitation and Recovery: A Guideline for Healthcare Professionals From the American  
323 Heart Association/American Stroke Association. *Stroke*. 2016;47(6):e98-e169.
- 324 14. Rudd T, Bowen A, James M, Young G. National clinical guideline for stroke - Prepared by the  
325 Intercollegia the Stroke Working Party. 2016.
- 326 15. Netherlands Society of Neurology. Dutch National Guideline for Stroke. 2017
- 327 16. Bowen A, Knapp P, Hoffman A, Lowe D. Psychological services for people with stroke:  
328 compliance with the U.K. National Clinical Guidelines. *Clin. Rehabil*. 2005;19(3):323-30.
- 329 17. Hart S, Morris R. Screening for depression after stroke: an exploration of professionals'  
330 compliance with guidelines. *Clin. Rehabil*. 2008;22(1):60-70.
- 331 18. Castor EDC. (2019). Castor Electronic Data Capture. Available at: <https://castoredc.com>.
- 332 19. MacKenzie HM, Rice D, Teasell R, Macaluso S. Screening Adherence for Depression Post  
333 Stroke: Evaluation of Outpatients, a London Experience (SAD PEOPLE). *Top. Stroke Rehabil*.  
334 2019;26(1):6-17.
- 335 20. van Schaik SM, de Vries BS, Weinstein HC, Visser MC, Van den Berg-Vos RM. Practice  
336 variation in long-term secondary stroke prevention in The Netherlands. *J. Stroke Cerebrovasc. Dis*.  
337 2015;24(3):566-72.

- 1  
2  
3 338 21. Otterman NM, van der Wees PJ, Bernhardt J, Kwakkel G. Physical therapists' guideline  
4 339 adherence on early mobilization and intensity of practice at dutch acute stroke units: a country-wide  
5 340 survey. *Stroke*. 2012;43(9):2395-401.
- 6 341 22. Fischer F, Lange K, Klose K, Greiner W, Kraemer A. Barriers and strategies in guideline  
7 342 implementation - A scoping review. *Healthcare*. 2016;4(3).
- 8 343 23. Grol R. Successes and failures in the implementation of evidence-based guidelines for clinical  
9 344 practice. *Medical Care*. 2001;39(8 Suppl 2):li46-54.
- 10 345 24. Swartz RH, Bayley M, Lanctot KL, Murray BJ, Cayley ML, Lien K, et al. Post-stroke depression,  
11 346 obstructive sleep apnea, and cognitive impairment: Rationale for, and barriers to, routine screening.  
12 347 *Int. J. Stroke*. 2016;11(5):509-18.
- 13 348 25. Van Heugten CM, Walton L, Hentschel U. Can we forget the Mini-Mental State Examination?  
14 349 A systematic review of the validity of cognitive screening instruments within one month after stroke.  
15 350 *Clin. Rehabil*. 2015;29(7):694-704.
- 16 351 26. Burton L, Tyson SF. Screening for cognitive impairment after stroke: A systematic review of  
17 352 psychometric properties and clinical utility. *J. Rehabil. Med*. 2015;47(3):193-203.
- 18 353 27. Janssen ten Haaf M, Kors-Walraven A, Harteraad. Quality criteria in stroke care, patients'  
19 354 perspective. 2018. Accessible at: [https://www.kennisnetwerkcva.nl/news\\_cats/kwaliteitscriteria-cva-  
20 355 zorg-geformuleerd-vanuit-patientperspectief/](https://www.kennisnetwerkcva.nl/news_cats/kwaliteitscriteria-cva-zorg-geformuleerd-vanuit-patientperspectief/).
- 21 356 28. Pollock A, St George B, Fenton M, Firkins L. Top 10 research priorities relating to life after  
22 357 stroke--consensus from stroke survivors, caregivers, and health professionals. *Int. J. Stroke*.  
23 358 2014;9(3):313-20.
- 24 359 29. arty ISW, Henssge U, Hoffman A, et al. National sentinel stroke audit 2010 round 7. London,  
25 360 UK: Royal College of Physicians of London. 2011.
- 26 361 30. Taylor GH, Broomfield NM. Cognitive Assessment and Rehabilitation Pathway for Stroke  
27 362 (CARPS). *Top. Stroke Rehabil*. 2013;20(3):270-82.
- 28 363 31. Fens M, van Heugten CM, Beusmans G, Metsemakers J, Kester A, Limburg M. Effect of a  
29 364 stroke-specific follow-up care model on the quality of life of stroke patients and caregivers: A  
30 365 controlled trial. *J. Rehabil. Med*. 2014;46(1):7-15.

366

367 **Table 1. Characteristics of respondents and non-respondents**

| Characteristic                                                               | Respondents, n=<br>52 | Non-respondents, n<br>= 26 |
|------------------------------------------------------------------------------|-----------------------|----------------------------|
| Female sex (%)                                                               | 19 (37)               | -                          |
| Age, median (interquartile range)                                            | 45 (40 – 57)          | -                          |
| Neurologist (%)                                                              | 49 (94)               | -                          |
| Nurse practitioner or physician assistant at the<br>neurology department (%) | 3 (6)                 | -                          |
| Type of hospital                                                             |                       |                            |
| University (%)                                                               | 7 (15)                | 1 (4)                      |
| Large general (%)                                                            | 44 (87)               | 25 (96)                    |
| Small general (%)                                                            | 1 (2)                 | 0 (0)                      |

368

369 **Table 2. Screening for cognitive problems after TIA and ischemic stroke**

| Item                                                                                 | Answer options                                         | n  | (%)  |
|--------------------------------------------------------------------------------------|--------------------------------------------------------|----|------|
| <b>1. Are patients screened for cognitive problems?</b>                              | Always                                                 | 8  | (15) |
|                                                                                      | Mostly                                                 | 23 | (44) |
|                                                                                      | Sometimes                                              | 19 | (37) |
|                                                                                      | Never                                                  | 2  | (4)  |
| <b>2. Are validated screening instruments used? *</b>                                | Yes                                                    | 42 | (84) |
|                                                                                      | No                                                     | 8  | (16) |
| <b>3. Which screening instrument(s) is / are used? † ‡</b>                           | MoCA                                                   | 35 | (83) |
|                                                                                      | MMSE                                                   | 21 | (50) |
|                                                                                      | CLCE-24                                                | 6  | (14) |
|                                                                                      | Other                                                  | 4  | (9)  |
| <b>4. When does screening take place? * ‡</b>                                        | During hospital admission                              | 31 | (62) |
|                                                                                      | < 1 week after discharge                               | 2  | (4)  |
|                                                                                      | 1 – 4 weeks after discharge                            | 5  | (10) |
|                                                                                      | 4 – 8 weeks after discharge                            | 19 | (38) |
|                                                                                      | >8 weeks after discharge                               | 14 | (28) |
| <b>5. Do patients receive information about possible cognitive problems?</b>         | Always                                                 | 15 | (28) |
|                                                                                      | Mostly                                                 | 25 | (48) |
|                                                                                      | Sometimes                                              | 12 | (23) |
|                                                                                      | Never                                                  | 0  | (0)  |
| <b>6. Do patients receive written information about possible cognitive problems?</b> | Always                                                 | 13 | (25) |
|                                                                                      | Mostly                                                 | 13 | (25) |
|                                                                                      | Sometimes                                              | 7  | (14) |
|                                                                                      | Never                                                  | 19 | (37) |
| <b>7. Do caregivers receive information about possible cognitive problems?</b>       | Always                                                 | 13 | (25) |
|                                                                                      | Mostly                                                 | 23 | (44) |
|                                                                                      | Sometimes                                              | 15 | (29) |
|                                                                                      | Never                                                  | 1  | (2)  |
| <b>8. Reasons for referral to specialized care ‡</b>                                 | Cognitive complaints                                   | 36 | (69) |
|                                                                                      | Clinical suspicion of cognitive disorders              | 36 | (69) |
|                                                                                      | Abnormal screening results                             | 30 | (58) |
|                                                                                      | Abnormal results during neuropsychological examination | 14 | (27) |
| <b>9. Who is the treating physician for cognitive problems? ‡</b>                    | Neurologist                                            | 35 | (67) |
|                                                                                      | Resident in neurology                                  | 3  | (6)  |
|                                                                                      | Nurse practitioner or physician assistant              | 23 | (55) |
|                                                                                      | Rehabilitation physician                               | 30 | (58) |
|                                                                                      | Psychologist                                           | 6  | (12) |
|                                                                                      | Geriatrician                                           | 8  | (15) |
|                                                                                      | Nursing home doctor                                    | 6  | (12) |
|                                                                                      | General practitioner                                   | 16 | (31) |
|                                                                                      | Occupational therapist                                 | 5  | (10) |
| <b>10. Does your hospital have a protocol or</b>                                     | Yes                                                    | 12 | (23) |

|     | <b>guideline for follow-up care for cognitive problems?</b>                                      | No      | 39 (75) |
|-----|--------------------------------------------------------------------------------------------------|---------|---------|
|     |                                                                                                  | Missing | 1 (2)   |
| 370 | MoCA: Montreal Cognitive Assessment; MMSE: Mini-Mental State Examination; CLCE-24:               |         |         |
| 371 | Checklist for Cognitive and Emotional Consequences following Stroke.                             |         |         |
| 372 | * Items 2 and 4 were only asked if item 1 had been marked 'Always', 'Mostly' or 'Sometimes'.     |         |         |
| 373 | † Item 3 was only asked when item 2 had been marked 'Yes'.                                       |         |         |
| 374 | ‡ These items allowed multiple answers and were analysed accordingly, see 'Statistical Analysis' |         |         |
| 375 | paragraph; consequently, the sum of the percentages is not 100%.                                 |         |         |

For peer review only

376 **Table 3. Screening for emotional problems after TIA and ischemic stroke**

| Item                                                                                                  | Answer options                            | n  | (%)  |
|-------------------------------------------------------------------------------------------------------|-------------------------------------------|----|------|
| <b>1. Are patients screened for emotional problems?</b>                                               | Always                                    | 10 | (19) |
|                                                                                                       | Mostly                                    | 19 | (37) |
|                                                                                                       | Sometimes                                 | 20 | (39) |
|                                                                                                       | Never                                     | 3  | (6)  |
| <b>2. Are validated screening instruments used? *</b>                                                 | Yes                                       | 31 | (63) |
|                                                                                                       | No                                        | 18 | (37) |
| <b>3. Which screening instrument(s) is / are used? † ‡</b>                                            | HADS                                      | 27 | (87) |
|                                                                                                       | CLCE-24                                   | 4  | (13) |
|                                                                                                       | HDRS                                      | 1  | (3)  |
|                                                                                                       | BDI                                       | 1  | (3)  |
|                                                                                                       | SIGEB                                     | 2  | (6)  |
| <b>4. When does screening take place? * ‡</b>                                                         | During hospital admission                 | 14 | (29) |
|                                                                                                       | < 1 week after discharge                  | 1  | (2)  |
|                                                                                                       | 1 – 4 weeks after discharge               | 13 | (27) |
|                                                                                                       | 4 – 8 weeks after discharge               | 21 | (43) |
|                                                                                                       | >8 weeks after discharge                  | 12 | (25) |
| <b>5. Do patients receive information about possible emotional problems?</b>                          | Always                                    | 11 | (21) |
|                                                                                                       | Mostly                                    | 21 | (40) |
|                                                                                                       | Sometimes                                 | 18 | (35) |
|                                                                                                       | Never                                     | 2  | (4)  |
| <b>6. Do patients receive written information about possible emotional problems?</b>                  | Always                                    | 9  | (17) |
|                                                                                                       | Mostly                                    | 12 | (23) |
|                                                                                                       | Sometimes                                 | 12 | (23) |
|                                                                                                       | Never                                     | 19 | (37) |
| <b>7. Do caregivers receive information about possible emotional problems?</b>                        | Always                                    | 8  | (15) |
|                                                                                                       | Mostly                                    | 13 | (25) |
|                                                                                                       | Sometimes                                 | 12 | (23) |
|                                                                                                       | Never                                     | 19 | (37) |
| <b>8. Reason for referral to specialized care ‡</b>                                                   | Emotional complaints                      | 37 | (71) |
|                                                                                                       | Clinical suspicion of emotional disorders | 31 | (60) |
|                                                                                                       | Abnormal screening results                | 14 | (27) |
| <b>9. Who is the treating physician for emotional problems? ‡</b>                                     | Neurologist                               | 30 | (58) |
|                                                                                                       | Resident in neurology                     | 3  | (6)  |
|                                                                                                       | Nurse practitioner or physician assistant | 27 | (52) |
|                                                                                                       | Rehabilitation physician                  | 23 | (44) |
|                                                                                                       | Psychiatrist                              | 1  | (2)  |
|                                                                                                       | Psychologist                              | 14 | (27) |
|                                                                                                       | Geriatrician                              | 5  | (10) |
|                                                                                                       | General practitioner                      | 16 | (31) |
| <b>10. Does your hospital have a protocol or guideline for follow-up care for emotional problems?</b> | Yes                                       | 9  | (17) |
|                                                                                                       | No                                        | 42 | (81) |
|                                                                                                       | Missing                                   | 1  | (2)  |

1  
2  
3 377 HADS: Hospital Anxiety and Depression Scale; CLCE-24: Checklist for Cognitive and Emotional  
4  
5 378 Consequences following Stroke; HDRS: Hamilton Depression Rating Scale; BDI: Beck Depression  
6  
7 379 Inventory; SIGEB: Assessment tool for long-term Consequences After Stroke  
8  
9 380 (*'Signaleringsinstrument voor de lange termijn Gevolgen van een Beroerte'*)(31)  
10  
11 381 \* Items 2 and 4 were only asked when item 1 had been marked 'Always', 'Mostly' or 'Sometimes'.  
12  
13 382 † Item 3 was only asked when item 2 had been marked 'Yes'.  
14  
15 383 ‡ These items allowed multiple answers and were analysed accordingly, see 'Statistical Analysis'  
16  
17 384 paragraph; consequently, the sum of the percentages is not 100%.  
18  
19  
20  
21  
22  
23  
24  
25  
26  
27  
28  
29  
30  
31  
32  
33  
34  
35  
36  
37  
38  
39  
40  
41  
42  
43  
44  
45  
46  
47  
48  
49  
50  
51  
52  
53  
54  
55  
56  
57  
58  
59  
60



## Checklist for preparing the report of a survey

1. Burns et al., *A guide for the design and conduct of self-administered surveys of clinicians*, *CMAJ*. 2008 Jul 29; 179(3): 245–252. doi: [10.1503/cmaj.080372](https://doi.org/10.1503/cmaj.080372)

2. Huston P. *Reporting on surveys: information for authors and peer reviewers*. *CMAJ* 1996;154:1695-704

---

### Abstract

---

|                                        |                                                                                                                                                                      |
|----------------------------------------|----------------------------------------------------------------------------------------------------------------------------------------------------------------------|
| Is the objective clearly stated?       | Yes, see subhead 'Objectives', page 3.                                                                                                                               |
| Is the design of the study stated?     | Yes, see subhead 'Methods', page 3.                                                                                                                                  |
| Is the study setting well described?   | Yes, see subhead 'Methods', page 3.                                                                                                                                  |
| Is the survey population described?    | Yes, see subhead 'Methods', page 3.                                                                                                                                  |
| Are the outcome measures identified?   | Partly, we described to conduct a survey, see subhead 'Methods', page 4, but a full explanation on all different items was not considered suitable for the abstract. |
| Are the main results clearly reported? | Yes, see subhead 'Results', page 3.                                                                                                                                  |
| Are the conclusions appropriate?       | Yes, the conclusion answers the objective and is in line with the results. See subhead 'Conclusion', page 4.                                                         |

---

### Introduction

---

|                                                             |                                              |
|-------------------------------------------------------------|----------------------------------------------|
| Is the problem clearly stated?                              | Yes, see paragraph 'Introduction', page 4-5. |
| Is the pertinent literature cited and critically appraised? | Yes, see paragraph 'Introduction', page 4-5. |
| Is the relevance of the research question explained?        | Yes, see paragraph 'Introduction', page 5.   |
| Is the objective clearly stated?                            | Yes, see paragraph 'Introduction', page 5.   |

---

### Methods

---

|                                                                                              |                                                                                                                                                                                                                                                |
|----------------------------------------------------------------------------------------------|------------------------------------------------------------------------------------------------------------------------------------------------------------------------------------------------------------------------------------------------|
| Is the study design appropriate to the objective?                                            | Yes, neurologists in all hospitals in the Netherlands were invited to participate, therewith enhancing its generalizability. As we did not intend to measure change over time, a cross-sectional survey sufficed.                              |
| Is the setting clearly described?                                                            | Yes, see subhead 'Study design and participants', page 6.                                                                                                                                                                                      |
| Are the methods described clearly enough to permit other researchers to duplicate the study? | Yes, see subhead 'Study design and participants', page 6. Moreover, all items of the questionnaire are displayed in Table 2 and Table 3, page 18 – 21.                                                                                         |
| Is the survey sample likely to be representative of the population?                          | Yes, neurologists in all hospitals in the Netherlands were invited to participate. The response rate was acceptable (67%) <sup>1</sup> and responders were spread across the country. No further inclusion or exclusion criteria were applied. |
| Is the questionnaire described adequately?                                                   | The questionnaire is described in paragraph                                                                                                                                                                                                    |

|    |                                                 |                                                     |
|----|-------------------------------------------------|-----------------------------------------------------|
| 1  |                                                 |                                                     |
| 2  |                                                 |                                                     |
| 3  |                                                 |                                                     |
| 4  |                                                 | 'Development and content of the survey', page       |
| 5  |                                                 | 6-7. All items of the questionnaire are displayed   |
| 6  |                                                 | in Table 2 and Table 3, page 18 – 21.               |
| 7  | Have the validity and reliability of the        | Face validity was tested by a multidisciplinary     |
| 8  | questionnaire been established?                 | team, including a clinical neuropsychologist, a     |
| 9  |                                                 | rehabilitation physician, two vascular stroke       |
| 10 |                                                 | neurologists and a resident in neurology.           |
| 11 |                                                 | As the questionnaire was specifically developed     |
| 12 |                                                 | for this purpose only, further testing for validity |
| 13 |                                                 | and reliability was not considered feasible.        |
| 14 | Was the questionnaire administered in a         | Yes, the survey was administered online in a        |
| 15 | satisfactory way?                               | web-based system called Castor EDC. We              |
| 16 |                                                 | ensured that all potential respondents had          |
| 17 |                                                 | access to electronic mail. A data manager           |
| 18 |                                                 | verified the content and structure after the        |
| 19 |                                                 | survey had been built. Non-respondents              |
| 20 |                                                 | received up to two subsequent emails.               |
| 21 |                                                 |                                                     |
| 22 | Are the statistical methods used appropriately? | Yes, descriptive analyses were used to display      |
| 23 |                                                 | the results. Only the results of multiple-answer    |
| 24 |                                                 | multiple choice questions were transformed, as      |
| 25 |                                                 | is described in paragraph 'Statistical analysis',   |
| 26 |                                                 | page 7.                                             |
| 27 |                                                 |                                                     |
| 28 |                                                 |                                                     |

---

## Results

|    |                                                  |                                                   |
|----|--------------------------------------------------|---------------------------------------------------|
| 30 | Do the results address the objective?            | Yes, the results address the current clinical     |
| 31 |                                                  | practice of screening for cognitive and emotional |
| 32 |                                                  | problems after TIA and ischemic stroke at         |
| 33 |                                                  | neurology departments in hospitals in the         |
| 34 |                                                  | Netherlands, see paragraph 'Results', page 7 –    |
| 35 |                                                  | 10.                                               |
| 36 | Are all respondents accounted for?               | Yes, the total number of surveys sent is          |
| 37 |                                                  | considered as well as the number of               |
| 38 |                                                  | respondents and non-respondents.                  |
| 39 | Are the results clearly and logically presented? | Yes, the results in the Results section follow a  |
| 40 |                                                  | clear logic and follow the same structure as      |
| 41 |                                                  | Table 2 and Table 3. Only important (selected)    |
| 42 |                                                  | results are shown in text.                        |
| 43 | Are the tables and figures appropriate?          | Yes, both tables support the findings in text and |
| 44 |                                                  | show all items of the questionnaire in order to   |
| 45 |                                                  | increase transparency.                            |
| 46 | Are the numbers consistent in the text and the   | Yes.                                              |
| 47 | tables?                                          |                                                   |
| 48 |                                                  |                                                   |
| 49 |                                                  |                                                   |
| 50 |                                                  |                                                   |

---

## Discussion

|    |                                             |                                                    |
|----|---------------------------------------------|----------------------------------------------------|
| 51 | Are the results succinctly summarized?      | The results are summarized in the first section of |
| 52 |                                             | the 'Discussion', see page 10.                     |
| 53 | Are the implications of the results stated? | The implications are stated and discussed on       |
| 54 |                                             | page 11.                                           |
| 55 | Are other interpretations considered and    | The limitation section considers other             |
| 56 | refuted?                                    | possibilities for low screening rates.             |
| 57 | Are appropriate conclusions drawn?          | A conclusion is drawn in the last section of the   |
| 58 |                                             |                                                    |
| 59 |                                             |                                                    |
| 60 |                                             |                                                    |

1  
2  
3  
4  
5  
6  
7  
8  
9  
10  
11  
12  
13  
14  
15  
16  
17  
18  
19  
20  
21  
22  
23  
24  
25  
26  
27  
28  
29  
30  
31  
32  
33  
34  
35  
36  
37  
38  
39  
40  
41  
42  
43  
44  
45  
46  
47  
48  
49  
50  
51  
52  
53  
54  
55  
56  
57  
58  
59  
60

‘Discussion’ that answers the objective and is supported by the results shown in text and tables.

- 
1. *Sierles FS. How to do research with self-administered surveys. Acad Psychiatry 2003;27:104-13*

For peer review only

# BMJ Open

## Screening and follow-up care for cognitive and emotional problems after transient ischemic attack and ischemic stroke: a national, cross-sectional, online survey among neurologists in the Netherlands

|                                 |                                                                                                                                                                                                                                                                                                                                                                                                                                                                                                                                                                   |
|---------------------------------|-------------------------------------------------------------------------------------------------------------------------------------------------------------------------------------------------------------------------------------------------------------------------------------------------------------------------------------------------------------------------------------------------------------------------------------------------------------------------------------------------------------------------------------------------------------------|
| Journal:                        | <i>BMJ Open</i>                                                                                                                                                                                                                                                                                                                                                                                                                                                                                                                                                   |
| Manuscript ID                   | bmjopen-2020-046316.R1                                                                                                                                                                                                                                                                                                                                                                                                                                                                                                                                            |
| Article Type:                   | Original research                                                                                                                                                                                                                                                                                                                                                                                                                                                                                                                                                 |
| Date Submitted by the Author:   | 01-May-2021                                                                                                                                                                                                                                                                                                                                                                                                                                                                                                                                                       |
| Complete List of Authors:       | Slenders, Jos; OLVG, Neurology<br>Van den Berg-Vos, RM; OLVG, Neurology; Amsterdam UMC Locatie AMC, Neurology<br>Visser-Meily, Johanna; UMC Utrecht Brain Center Rudolf Magnus, Department of Rehabilitation, Physical Therapy Science & Sports; UMC Utrecht Brain Center Rudolf Magnus, Center of Excellence for Rehabilitation Medicine<br>van Heugten, Caroline M.; Maastricht University, Department of Neuropsychology & Psychopharmacology; Maastricht University Medical Centre+, School for Mental Health & Neuroscience<br>Kwa, Vincent; OLVG, Neurology |
| <b>Primary Subject Heading</b>: | Neurology                                                                                                                                                                                                                                                                                                                                                                                                                                                                                                                                                         |
| Secondary Subject Heading:      | Patient-centred medicine, Mental health, Neurology, Rehabilitation medicine                                                                                                                                                                                                                                                                                                                                                                                                                                                                                       |
| Keywords:                       | Stroke < NEUROLOGY, Organisation of health services < HEALTH SERVICES ADMINISTRATION & MANAGEMENT, REHABILITATION MEDICINE, Depression & mood disorders < PSYCHIATRY                                                                                                                                                                                                                                                                                                                                                                                              |
|                                 |                                                                                                                                                                                                                                                                                                                                                                                                                                                                                                                                                                   |

SCHOLARONE™  
Manuscripts



I, the Submitting Author has the right to grant and does grant on behalf of all authors of the Work (as defined in the below author licence), an exclusive licence and/or a non-exclusive licence for contributions from authors who are: i) UK Crown employees; ii) where BMJ has agreed a CC-BY licence shall apply, and/or iii) in accordance with the terms applicable for US Federal Government officers or employees acting as part of their official duties; on a worldwide, perpetual, irrevocable, royalty-free basis to BMJ Publishing Group Ltd ("BMJ") its licensees and where the relevant Journal is co-owned by BMJ to the co-owners of the Journal, to publish the Work in this journal and any other BMJ products and to exploit all rights, as set out in our [licence](#).

The Submitting Author accepts and understands that any supply made under these terms is made by BMJ to the Submitting Author unless you are acting as an employee on behalf of your employer or a postgraduate student of an affiliated institution which is paying any applicable article publishing charge ("APC") for Open Access articles. Where the Submitting Author wishes to make the Work available on an Open Access basis (and intends to pay the relevant APC), the terms of reuse of such Open Access shall be governed by a Creative Commons licence – details of these licences and which [Creative Commons](#) licence will apply to this Work are set out in our licence referred to above.

Other than as permitted in any relevant BMJ Author's Self Archiving Policies, I confirm this Work has not been accepted for publication elsewhere, is not being considered for publication elsewhere and does not duplicate material already published. I confirm all authors consent to publication of this Work and authorise the granting of this licence.

1  
2  
3 1 **Screening and follow-up care for cognitive and emotional problems after transient**  
4  
5 2 **ischemic attack and ischemic stroke: a national, cross-sectional, online survey among**  
6  
7 3 **neurologists in the Netherlands**  
8  
9

10 4 J.P.L. Slenders<sup>1</sup>, R.M. Van den Berg-Vos<sup>1,2</sup>, J.M.A. Visser-Meily<sup>3,4</sup>, C.M. van Heugten<sup>5,6</sup>,  
11  
12  
13 5 V.I.H. Kwa<sup>1</sup>  
14  
15  
16 6

17  
18  
19 7 1. Department of Neurology, OLVG, Amsterdam, the Netherlands  
20

21 8 2. Department of Neurology, Amsterdam UMC, the Netherlands  
22

23 9 3. Department of Rehabilitation, Physical Therapy Science & Sports, UMC Utrecht Brain  
24  
25  
26 10 Center, University Medical Center Utrecht, the Netherlands  
27

28 11 4. Center of Excellence for Rehabilitation Medicine, UMC Utrecht Brain Center, University  
29  
30  
31 12 Medical Center Utrecht, and De Hoogstraat Rehabilitation, Utrecht, the Netherlands  
32

33 13 5. Department of Neuropsychology & Psychopharmacology – Maastricht University, the  
34  
35  
36 14 Netherlands  
37

38 15 6. School for Mental Health & Neuroscience – Maastricht University Medical Center, the  
39  
40  
41 16 Netherlands  
42

43  
44  
45 17

46 18 **Corresponding author:**

47  
48 19 J.P.L. Slenders

49  
50 20 [j.p.l.slenders@olvg.nl](mailto:j.p.l.slenders@olvg.nl)

51  
52 21 0031 20 510 8802

53  
54 22 Department of Neurology - OLVG

55  
56 23 Jan Tooropstraat 164

57  
58  
59 24 1061AE Amsterdam, The Netherlands  
60

1  
2  
3  
4  
5  
6  
7  
8  
9  
10  
11  
12  
13  
14  
15  
16  
17  
18  
19  
20  
21  
22  
23  
24  
25  
26  
27  
28  
29  
30  
31  
32  
33  
34  
35  
36  
37  
38  
39  
40  
41  
42  
43  
44  
45  
46  
47  
48  
49  
50  
51  
52  
53  
54  
55  
56  
57  
58  
59  
60

- 25 Total number of tables: 3
- 26 Total number of figures: not applicable
- 27 Word count: [2674/4000]

For peer review only

1  
2  
3 **28 Abstract**  
4  
5

6 **29 Background:** After stroke, many patients experience cognitive and/or emotional problems.  
7  
8  
9 **30** While national guidelines recommend screening for these problems, actual screening rates  
10  
11 **31** might be limited.  
12

13  
14 **32 Objective:** This study aimed to examine the clinical practice at neurology departments  
15  
16 **33** regarding screening, information provision and follow-up care for cognitive and emotional  
17  
18 **34** problems after TIA and ischemic stroke.  
19

20  
21  
22 **35 Methods:** A nationwide, cross-sectional, online survey was conducted between October 2018  
23  
24 **36** and October 2019 among neurologists in all hospitals in the Netherlands.  
25

26  
27  
28 **37 Results:** Neurologists in 78 hospitals were invited to join the survey, and 52 (67%) of them  
29  
30 **38** completed it. Thirty-one (59%) neurologists reported that screening for cognitive problems  
31  
32 **39** after TIA and ischemic stroke was mostly or always performed. When cognitive screening was  
33  
34 **40** performed, 42 (84%) used validated screening instruments. Twenty-nine (56%) of the  
35  
36 **41** respondents reported that screening for emotional problems was mostly or always performed.  
37  
38 **42** When emotional screening was performed, 31 (63%) reported using validated screening  
39  
40 **43** instruments. Timing of screening and information provision was highly variable, and the  
41  
42 **44** majority reported that there was no protocol for follow-up care when cognitive or emotional  
43  
44 **45** problems were found.  
45  
46  
47

48  
49 **46 Conclusions:** This study demonstrates that clinical practice at neurology departments is highly  
50  
51 **47** variable regarding screening, information provision and follow-up care for cognitive and  
52  
53 **48** emotional problems in patients after TIA or ischemic stroke. Approximately half of the  
54  
55 **49** participating neurologists reported that screening was performed only sometimes or never for  
56  
57 **50** cognitive and emotional problems after TIA and ischemic stroke.  
58  
59  
60



1  
2  
3 51  
4  
5  
6 52**Keywords**7  
8  
9 53 Screening, cognition, depression and anxiety, stroke, rehabilitation, survey  
10  
11  
12  
13 54  
14  
1516 55 **Strengths and limitations of this study**

- 17  
18  
19 56 • A detailed overview is provided of the current clinical practice at neurology departments  
20  
21 57 with regard to screening for cognitive and emotional problems after TIA or ischemic  
22  
23 58 stroke.
- 24  
25  
26 59 • Multiple opportunities are identified to further optimize the clinical practice of  
27  
28 60 screening and care for cognitive and emotional problems after stroke.
- 29  
30  
31 61 • Neurologists in all Dutch hospitals were invited to participate and a satisfactory  
32  
33 62 percentage completed the survey.
- 34  
35  
36 63 • Being a survey study, the results might deviate from the actual clinical practice, for  
37  
38 64 example due to social desirability.
- 39  
40  
41 65 • This study focuses on the views of neurologists and their teams, which might  
42  
43 66 underestimate the true screening rates for cognitive and emotional problems.

44  
45  
46 67  
47  
4849 68 **Introduction**

50  
51  
52 69 Stroke is a leading cause of disability worldwide.(1) After stroke, many patients experience  
53  
54 70 cognitive and/or emotional problems,(2-6) which affect their quality of life and participation.(7-  
55  
56 71 11) Therefore, national guidelines recommend screening and care for cognitive and emotional  
57  
58 72 problems after stroke.(12-15) The Dutch guideline recommends screening all stroke patients for

1  
2  
3 73 cognitive problems, using the Montreal Cognitive Assessment (MoCA) rather than the Mini  
4  
5 74 Mental State Examination (MMSE), and referral to rehabilitation services when cognitive  
6  
7  
8 75 problems are present.(15) With regard to emotional problems, multiple screening instruments  
9  
10 76 are considered suitable, namely the Hospital Anxiety and Depression Scale (HADS), the Beck  
11  
12 77 Depression Inventory (BDI), the Symptom CheckList (SCL-90) subscale for depression, and  
13  
14 78 the Hamilton Depression Scale (HDS).(15) When emotional problems are present,  
15  
16  
17 79 psychotherapy or pharmacotherapy should be considered.(15) Previous studies in the United  
18  
19 80 Kingdom found that compliance with the guidelines is low as regards screening for cognitive  
20  
21 81 and emotional problems after transient ischemic attack (TIA) and ischemic stroke.(16, 17) In  
22  
23  
24 82 the Netherlands, in general, stroke patients are admitted to a stroke unit in the acute phase,  
25  
26 83 where a neurologist functions as treating physician. From the stroke unit, patients are  
27  
28 84 discharged home, to a rehabilitation centre or to a nursing home. If patients are discharged  
29  
30  
31 85 home, they are followed-up at the outpatient clinics of the neurology department.

32  
33  
34 86 This study aimed to investigate the current clinical practice of screening for cognitive and  
35  
36 87 emotional problems after TIA and ischemic stroke at neurology departments in hospitals in the  
37  
38 88 Netherlands. This study examined: (1) if patients with TIA or ischemic stroke are screened for  
39  
40 89 cognitive and emotional problems, (2) if so, which screening instruments are used, (3) when  
41  
42 90 screening is performed, (4) whether patients receive information regarding the presence and  
43  
44 91 nature of cognitive and emotional problems and (5) what kind of follow-up care is delivered  
45  
46 92 when cognitive and/or emotional problems are present.

47  
48  
49  
50  
51 93

## 52 53 54 94 **Materials and Methods**

### 55 56 57 95 ***Study design and participants***

58  
59  
60

1  
2  
3 96 A nationwide, cross-sectional, online survey was conducted in the Netherlands between  
4  
5 97 October 2018 and October 2019. Neurologists in all Dutch hospitals with an inpatient neurology  
6  
7 98 ward were invited to participate in this survey. In the Netherlands only neurologists, and no  
8  
9  
10 99 other specialists, act as treating physicians at stroke units. For every neurology department, one  
11  
12 100 neurologist with experience of stroke care was asked to complete the survey about screening  
13  
14 101 and care for cognitive and emotional problems after TIA and ischemic stroke at their  
15  
16 102 department. The neurologist was allowed to forward the survey to another neurologist, a nurse  
17  
18 103 practitioner or a physician assistant within the same department with experience of stroke after-  
19  
20 104 care.

21  
22  
23  
24  
25 105 The data supporting the findings of this study are available from the corresponding author upon  
26  
27 106 reasonable request. Ethical approval for this study was waived by the local ethics committee of  
28  
29 107 OLVG Amsterdam. All data were handled in accordance with the EU General Data  
30  
31 108 Protection Regulation 2016/679.

32  
33  
34  
35 109

### 36 37 38 110 ***Development and content of the survey***

39  
40  
41 111 The survey was developed by a multidisciplinary team, including a clinical neuropsychologist,  
42  
43 112 a rehabilitation physician, two vascular stroke neurologists and a resident in neurology. A data  
44  
45 113 manager verified the content and structure after the survey had been built in the web-based  
46  
47 114 system Castor EDC.(18)

48  
49  
50  
51 115 The survey was divided into two parts: one part about screening and follow-up care for  
52  
53 116 cognitive consequences after TIA and ischemic stroke, and the second part about screening and  
54  
55 117 follow-up care for emotional consequences. Both parts included 10 multiple choice questions,  
56  
57 118 resulting in 20 questions in total (see Table 1 and Table 2). The number of answer options  
58  
59  
60

1  
2  
3 119 ranged from two to nine. The multiple choice questions were formatted either as single-answer  
4  
5 120 multiple choice questions (only one answer allowed) or as multiple-answer multiple choice  
6  
7  
8 121 questions (multiple answers allowed).  
9

10  
11 122  
12  
13

### 14 123 *Survey administration*

15  
16  
17 124 All neurologists received an invitation by email to participate in this online survey. Non-  
18  
19  
20 125 respondents received up to two subsequent emails. If the questionnaire was not completed after  
21  
22 126 invitation by email, the neurologist was contacted by telephone. Participants completed the  
23  
24 127 survey independently online, using a computer. Data were collected anonymously.  
25  
26  
27

28 128  
29  
30

### 31 129 *Statistical analysis*

32  
33  
34 130 The results of the survey were analysed using descriptive statistics. For single-answer multiple  
35  
36 131 choice questions, all answer options were recorded as percentages of the total number of  
37  
38  
39 132 respondents. For multiple-answer multiple choice questions the following analysis was  
40  
41 133 performed. First, a dichotomous dummy variable was computed for each potential answer  
42  
43 134 option. The options of the dummy variables were 'marked' or 'not marked' for each answer  
44  
45  
46 135 option. All answer options were then recorded as percentages of 'marked', divided by the total  
47  
48 136 number of respondents. IBM SPSS version 22.0 was used for analyses.  
49  
50

51 137  
52  
53

### 54 138 *Patient and public involvement*

55  
56  
57  
58 139 Patients or the public were not involved in the design, conduct or reporting of this research.  
59  
60

1  
2  
3 140  
4  
56 141 **Results**9 142 *Response rate and characteristics of the participants*

12 143 Of the neurologists in 78 Dutch hospitals who were invited to join the survey, 52 (67%)  
14 144 completed the survey. The characteristics of the respondents are shown in Table 3. Nineteen  
16 145 (37%) participants were female, and the median age was 45 years (interquartile range: 40 – 57);  
18 146 seven (15%) were working at a university hospital, 44 (87%) in a large general hospital (more  
20 147 than 100 stroke patients per year) and one (2%) in a small general hospital (less than 100 stroke  
22 148 patients per year). Of the non-respondents, one (4%) was working at a university hospital, 25  
24 149 (96%) at a large general hospital and none at a small general hospital.

26 150  
27  
28  
29  
3031 151 *Screening for cognitive problems after TIA and ischemic stroke*

33 152 The various items regarding screening for cognitive problems in patients after TIA or ischemic  
35 153 stroke are shown in Table 1. Of the respondents, 31 (59%) reported that patients were mostly  
37 154 or always screened for cognitive problems after TIA or ischemic stroke, while 21 (41%) said  
39 155 that patients were sometimes or never screened. When screening for cognitive problems was  
41 156 performed, 42 (84%) stated that validated screening instruments were used. When screening  
43 157 instruments were used, the most commonly used instruments were the MoCA (n = 35; 84%),  
45 158 the Mini-Mental State Examination (MMSE) (n = 21; 50%) and the Checklist for Cognitive and  
47 159 Emotional Consequences following Stroke (CLCE-24) (n = 6; 14%). The timing of screening  
49 160 for cognitive problems varied greatly among the hospitals: 31 (62%) screened during hospital  
51 161 admission and 19 (38%) at a follow-up visit between 4-8 weeks after TIA or ischemic stroke.  
53 162 Fourteen (27%) stated that they screened at multiple time points. According to the participants,

1  
2  
3 163 the majority of patients received some form of information about possible cognitive problems  
4  
5 164 after TIA or ischemic stroke during admission or at follow-up visits, but 19 (37%) reported that  
6  
7 165 no written information was provided at all. When cognitive problems were observed, it was the  
8  
9 166 local neurologist, nurse practitioner or physician assistant, or the rehabilitation physician, who  
10  
11 167 acted as the treating physician in most cases. Thirty-nine of the participants (75%) stated that  
12  
13 168 they did not have a guideline or protocol for follow-up care in case of cognitive problems after  
14  
15 169 TIA and ischemic stroke. The reasons for referral to specialized care varied considerably among  
16  
17 170 the hospitals: 36 (69%) referred patients based on cognitive complaints, 36 (69%) based on  
18  
19 171 cognitive disorders, 30 (58%) based on positive screening results and 14 (27%) based on  
20  
21 172 deviant results during a neuropsychological examination. All respondents from university  
22  
23 173 hospitals (100%) reported to use validated screening instruments when a screening was  
24  
25 174 performed, whereas 35 respondents from general hospitals (83%) reported to use validated  
26  
27 175 screening instruments when screening was performed. Apart from the use of validated  
28  
29 176 screening instruments, screening for cognitive problems after TIA and ischemic stroke was  
30  
31 177 overall comparable between university and general hospitals.  
32  
33  
34  
35  
36  
37  
38  
39  
40

178

### 179 ***Screening for emotional problems after TIA and ischemic stroke***

41  
42  
43  
44  
45 180 Table 2 shows the survey responses for the items about screening for emotional problems.  
46  
47 181 According to 29 (56%) of the participants, patients were mostly or always screened for  
48  
49 182 emotional problems after TIA or ischemic stroke at their hospital. When patients were screened,  
50  
51 183 31 (63%) used validated screening instruments. When screening instruments were used, the  
52  
53 184 most commonly used instrument was the Hospital Anxiety and Depression Scale (HADS) (n =  
54  
55 185 27; 87%). Screening for emotional problems was performed at variable time points, but mostly  
56  
57 186 during hospital admission (n = 14; 29%) or at a follow-up visit between 1 – 4 weeks after  
58  
59  
60

1  
2  
3 187 discharge (n = 21; 43%). Fifteen percent of the participants reported that patients were screened  
4  
5 188 at multiple time points. According to 22 (61%) of the participants, information about the  
6  
7 189 possible emotional sequelae was given to most or all patients, and according to 21 (40%),  
8  
9  
10 190 written information was mostly or always given. According to the respondents, 42 (81%) of the  
11  
12 191 hospitals had no guideline or protocol for follow-up care for emotional problems after TIA and  
13  
14 192 ischemic stroke. When emotional problems arose, it was mostly the neurologist who acted as  
15  
16 193 the treating physician (n = 30; 58%), followed by the nurse practitioner or physician assistant  
17  
18 194 (n = 27; 52%), the rehabilitation physician (n = 23; 44%) or the patient's general practitioner  
19  
20 195 (n = 16; 31%). Indications for referral to specialized care were emotional complaints (n = 37;  
21  
22 196 71%), clinical suspicion of an emotional disorder (n = 31; 60%) and positive screening results  
23  
24 197 (n = 14; 27%). Apart from the timing of screening, screening for emotional problems after TIA  
25  
26 198 and ischemic stroke was overall comparable between university and general hospitals.  
27  
28  
29  
30  
31  
32  
33  
34

## 35 200 **Discussion**

36  
37  
38 201 Our nationwide survey in the Netherlands found a wide variety as regards screening at  
39  
40 202 neurology departments for cognitive and emotional problems in patients after TIA or ischemic  
41  
42 203 stroke. While a small majority of the participants reported screening for cognitive and emotional  
43  
44 204 problems was performed in most or all patients with TIA or ischemic stroke, the others did so  
45  
46 205 only sometimes, or never. When patients were screened, the most commonly used instruments  
47  
48 206 for cognitive problems were the MoCA and the MMSE, and for emotional problems the HADS.  
49  
50 207 Screening for cognitive and emotional problems was performed at various time points, and  
51  
52 208 information provision was highly variable. The vast majority of respondents indicated that their  
53  
54 209 hospital lacked a protocol or a guideline for follow-up care for cognitive and emotional  
55  
56 210 problems after stroke. These results were comparable between university and general hospitals.  
57  
58  
59  
60

1  
2  
3 211 A strength of this study is that neurologists in all Dutch hospitals with a neurology ward were  
4  
5 212 invited to participate, and that a satisfactory percentage of invited clinicians actually completed  
6  
7 213 the survey. A limitation of this study is its design as a survey, which might not accurately reflect  
8  
9 214 current clinical practice, for example due to social desirability. In addition, we focused on the  
10  
11 215 views of the neurologists and their teams. This might underestimate the true screening rates for  
12  
13 216 cognitive and emotional problems, since part of this care might be provided by, for example,  
14  
15 217 general practitioners or rehabilitation physicians. Besides, in the current questionnaire, no  
16  
17 218 distinction was made between TIA and ischemic stroke. While patients with TIA and ischemic  
18  
19 219 stroke receive comparable follow-up treatment in the Netherlands, it is not known whether the  
20  
21 220 results of the current paper differ between TIA and ischemic stroke.  
22  
23  
24  
25  
26

27 221 National guidelines recommend screening for cognitive and emotional problems in all stroke  
28  
29 222 patients.(12-15) Nevertheless, almost half of the respondents reported that they only sometimes,  
30  
31 223 or even never, screened patients for cognitive and emotional problems after TIA or ischemic  
32  
33 224 stroke. Our findings focussed on the clinical practice in the Netherlands and are in accordance  
34  
35 225 with international studies, viz. from the United Kingdom and Canada, which also showed low  
36  
37 226 compliance rates with guideline recommendations to screen for cognitive and emotional  
38  
39 227 problems after stroke.(15-17, 19, 20) Since cognitive and emotional problems after stroke are  
40  
41 228 universal, these low compliance rates might hinder optimal treatment of the consequences of  
42  
43 229 stroke internationally. Therefore, it is important to identify and overcome barriers for screening.  
44  
45 230 Studies have identified multiple barriers to the implementation of evidence-based guidelines in  
46  
47 231 clinical practice.(21, 22) With regard to screening for cognitive and emotional problems after  
48  
49 232 stroke, multiple factors might explain the low rates of routine screening. First, there are  
50  
51 233 numerous screening tools for cognitive and emotional problems, and they can be time-  
52  
53 234 consuming and may be difficult to use for patients with language barriers or disabilities such as  
54  
55 235 aphasia, hearing loss or vision loss.(23) Second, insufficient time, training and expertise of  
56  
57  
58  
59  
60



1  
2  
3 236 clinicians might further limit routine screening, as well as the lack of a protocol for follow-up  
4  
5 237 care when a screening turns out to be positive.(19, 21-23) Third, stroke care predominantly  
6  
7 238 focuses on secondary prevention, which might overshadow the importance of screening for  
8  
9 239 cognitive and emotional problems.

10  
11  
12  
13 240 Remarkably, when screening for cognitive problems was performed, 50% of our respondents  
14  
15 241 who used screening instruments reported using the MMSE. However, two reviews have  
16  
17 242 demonstrated that the MMSE is not sufficiently sensitive to the cognitive consequences of  
18  
19 243 stroke, as it was originally designed to screen for the presence of dementia.(15, 24, 25) It is  
20  
21 244 recommended to use the MoCA as a screening instrument for cognitive disorders in patients  
22  
23 245 with stroke.(15, 25) When patients were screened for emotional problems after stroke, the vast  
24  
25 246 majority of the respondents said they used the HADS, as has been recommended.(15)

26  
27  
28  
29  
30 247 Apart from screening, information provision and follow-up care for cognitive and emotional  
31  
32 248 problems were also highly variable in our study, and most respondents reported that a protocol  
33  
34 249 for follow-up care was lacking. Nonetheless, cognitive and emotional problems are very  
35  
36 250 common after stroke, and a previous evaluation among patients identified information provision  
37  
38 251 after stroke as a major target for improvement.(26) Moreover, patients' evaluations underline  
39  
40 252 the importance of the cognitive and emotional sequelae, and patients even rated these  
41  
42 253 consequences as among the top 10 of research priorities in stroke.(27) Fortunately, attention is  
43  
44 254 increasingly being drawn to the cognitive and emotional consequences of stroke, and screening  
45  
46 255 rates seem to be increasing.(28) Still, our results suggest that further improvement is possible  
47  
48 256 and, in our opinion, desirable. Therefore, we recommend to perform screening for all patients  
49  
50 257 after stroke for cognitive and emotional problems with validated screening instruments such as  
51  
52 258 the MoCA and HADS, respectively. In our opinion, the additional use of stroke-specific patient-  
53  
54 259 reported screening instruments that measure subjective cognitive complaints and a wider  
55  
56 260 spectrum of emotional problems will provide even better and valuable insights into the

1  
2  
3 261 consequences of stroke. An example of such an instrument is the Checklist for the Detection of  
4  
5 262 Cognitive and Emotional Consequences After Stroke (CLCE-24). Additionally, we  
6  
7 263 recommend that such screenings should be performed by health care professionals with  
8  
9 264 experience in screening for cognitive and emotional problems, and with sufficient time to use  
10  
11 265 appropriate screening instruments. In our opinion, these screenings can be performed in primary  
12  
13 266 care, in hospitals or in rehabilitation centres. However, to ensure that all patients are actually  
14  
15 267 screened, it is important to have clear agreements embedded in the collaborative network of  
16  
17 268 stroke care. Furthermore, guidance for stroke patients with proven cognitive and emotional  
18  
19 269 problems can be further optimized by implementing local protocols for follow-up care. Follow-  
20  
21 270 up care for cognitive problems can include referral to a rehabilitation physician for treatment  
22  
23 271 such as cognitive rehabilitation.(29) With regard to follow-up care for emotional problems,  
24  
25 272 psycho-education, psychotherapy and pharmacotherapy can be considered.(15)

26  
27  
28  
29  
30  
31 273 In conclusion, this study indicates that stroke care practice at neurology departments in the  
32  
33 274 Netherlands is highly variable with regard to screening, information provision and follow-up  
34  
35 275 care for cognitive and emotional problems in patients after TIA or ischemic stroke. Almost half  
36  
37 276 of the respondents reported that they only sometimes or never screened for cognitive and  
38  
39 277 emotional problems after TIA and stroke. Therefore, in order to optimize stroke care, screening  
40  
41 278 rates should be improved and should include suitable screening instruments and a protocol for  
42  
43 279 follow-up care.  
44  
45  
46  
47  
48  
49  
50  
51  
52  
53  
54  
55  
56  
57  
58  
59  
60

1  
2  
3 **280 Acknowledgements:**  
4  
5

6 **281** We would like to thank all participants for their contributions to this study.  
7  
8

9 **282**  
10  
11

12 **283 Declarations**  
13  
14

15 **284** Conflicting interests: The authors declare that they have no competing interests  
16  
17

18 **285** Funding: This work was supported by ZonMw, programme Efficiency Studies; project  
19  
20  
21 **286** number 843004122.  
22  
23

24 **287** Informed consent: Informed consent was not sought for this study because participants were  
25  
26 **288** not subjected to procedures and because the questions were not regarded as confrontational or  
27  
28  
29 **289** time-consuming.  
30  
31

32 **290** Ethical approval: Ethical approval for this study was waived by the local ethics committee of  
33  
34 **291** OLVG Amsterdam. This study was completed in accordance with the Helsinki Declaration as  
35  
36 **292** revised in 2013.  
37  
38

39 **293** Data availability statement: The data that support the findings of this study are available from  
40  
41  
42 **294** the corresponding author upon reasonable request.  
43  
44

45 **295** Contributorship: RvdB, CH, VK, JS and AV were involved in the conception of the study  
46  
47 **296** design. RvdB, VK and JS were involved in participant recruitment. JS was involved in  
48  
49 **297** researching the literature, gaining ethical approval and data analysis. JS wrote the first draft of  
50  
51 **298** the manuscript. All authors reviewed and edited the manuscript and approved the final version  
52  
53  
54 **299** of the manuscript.  
55  
56  
57  
58  
59  
60

300 **References**

- 301 1. Feigin VL, Forouzanfar MH, Krishnamurthi R, Mensah GA, Connor M, Bennett DA, et al. Global  
302 and regional burden of stroke during 1990-2010: findings from the Global Burden of Disease Study  
303 2010. *Lancet*. 2014;383(9913):245-54.
- 304 2. Moran GM, Fletcher B, Feltham MG, Calvert M, Sackley C, Marshall T. Fatigue, psychological  
305 and cognitive impairment following transient ischaemic attack and minor stroke: a systematic review.  
306 *Eur. J. Neurol*. 2014;21(10):1258-67.
- 307 3. Van Rijsbergen MW, Mark RE, de Kort PL, Sitskoorn MM. Subjective cognitive complaints  
308 after stroke: a systematic review. *J. Stroke Cerebrovasc. Dis*. 2014;23(3):408-20.
- 309 4. Campbell Burton CA, Murray J, Holmes J, Astin F, Greenwood D, Knapp P. Frequency of  
310 anxiety after stroke: a systematic review and meta-analysis of observational studies. *Int. J. Stroke*.  
311 2013;8(7):545-59.
- 312 5. Sexton E, McLoughlin A, Williams DJ, Merriman NA, Donnelly N, Rohde D, et al. Systematic  
313 review and meta-analysis of the prevalence of cognitive impairment no dementia in the first year  
314 post-stroke. *Eur. Stroke J*. 2019;4(2):160-71.
- 315 6. Hackett ML, Pickles K. Part I: frequency of depression after stroke: an updated systematic  
316 review and meta-analysis of observational studies. *Int. J. Stroke*. 2014;9(8):1017-25.
- 317 7. de Graaf JA, van Mierlo ML, Post MWM, Achterberg WP, Kappelle LJ, Visser-Meily JMA. Long-  
318 term restrictions in participation in stroke survivors under and over 70 years of age. *Disabil. Rehabil*.  
319 2018;40(6):637-45.
- 320 8. Rafsten L, Danielsson A, Sunnerhagen KS. Anxiety after stroke: A systematic review and meta-  
321 analysis. *J. Rehabil. Med*. 2018;50(9):769-78.
- 322 9. De Wit L, Theuns P, Dejaeger E, Devos S, Gantenbein AR, Kerckhofs E, et al. Long-term impact  
323 of stroke on patients' health-related quality of life. *Disabil. Rehabil*. 2017;39(14):1435-40.
- 324 10. Babulal GM, Huskey TN, Roe CM, Goette SA, Connor LT. Cognitive impairments and mood  
325 disruptions negatively impact instrumental activities of daily living performance in the first three  
326 months after a first stroke. *Top. Stroke Rehabil*. 2015;22(2):144-51.
- 327 11. Van der Zee CH, Visser-Meily JM, Lindeman E, Jaap Kappelle L, Post MW. Participation in the  
328 chronic phase of stroke. *Top. Stroke Rehabil*. 2013;20(1):52-61.
- 329 12. Holloway RG, Arnold RM, Creutzfeldt CJ, Lewis EF, Lutz BJ, McCann RM, et al. Palliative and  
330 end-of-life care in stroke: a statement for healthcare professionals from the American Heart  
331 Association/American Stroke Association. *Stroke*. 2014;45(6):1887-916.
- 332 13. Winstein CJ, Stein J, Arena R, Bates B, Chorney LR, Cramer SC, et al. Guidelines for Adult  
333 Stroke Rehabilitation and Recovery: A Guideline for Healthcare Professionals From the American  
334 Heart Association/American Stroke Association. *Stroke*. 2016;47(6):e98-e169.
- 335 14. Rudd T, Bowen A, James M, Young G. National clinical guideline for stroke - Prepared by the  
336 Intercollegia the Stroke Working Party. 2016.
- 337 15. Netherlands Society of Neurology. Dutch National Guideline for Stroke. 2017
- 338 16. Bowen A, Knapp P, Hoffman A, Lowe D. Psychological services for people with stroke:  
339 compliance with the U.K. National Clinical Guidelines. *Clin. Rehabil*. 2005;19(3):323-30.
- 340 17. Hart S, Morris R. Screening for depression after stroke: an exploration of professionals'  
341 compliance with guidelines. *Clin. Rehabil*. 2008;22(1):60-70.
- 342 18. Castor EDC. (2019). Castor Electronic Data Capture. Available at: <https://castoredc.com>.
- 343 19. MacKenzie HM, Rice D, Teasell R, Macaluso S. Screening Adherence for Depression Post  
344 Stroke: Evaluation of Outpatients, a London Experience (SAD PEOPLE). *Top. Stroke Rehabil*.  
345 2019;26(1):6-17.
- 346 20. Hall R, Khan F, O'Callaghan C, Kapral MK, Hodwitz K, Kapila S et al. Spotlight on Secondary  
347 Stroke Prevention and Care. Ontario Stroke Evaluation Report. 2013.
- 348 21. Fischer F, Lange K, Klose K, Greiner W, Kraemer A. Barriers and strategies in guideline  
349 implementation - A scoping review. *Healthcare*. 2016;4(3).

- 1  
2  
3 350 22. Grol R. Successes and failures in the implementation of evidence-based guidelines for clinical  
4 351 practice. *Medical Care*. 2001;39(8 Suppl 2):li46-54.
- 5 352 23. Swartz RH, Bayley M, Lanctot KL, Murray BJ, Cayley ML, Lien K, et al. Post-stroke depression,  
6 353 obstructive sleep apnea, and cognitive impairment: Rationale for, and barriers to, routine screening.  
7 354 *Int. J. Stroke*. 2016;11(5):509-18.
- 8 355 24. Van Heugten CM, Walton L, Hentschel U. Can we forget the Mini-Mental State Examination?  
9 356 A systematic review of the validity of cognitive screening instruments within one month after stroke.  
10 357 *Clin. Rehabil*. 2015;29(7):694-704.
- 11 358 25. Burton L, Tyson SF. Screening for cognitive impairment after stroke: A systematic review of  
12 359 psychometric properties and clinical utility. *J. Rehabil. Med*. 2015;47(3):193-203.
- 13 360 26. Janssen ten Haaf M, Kors-Walraven A, Harteraad. Quality criteria in stroke care, patients'  
14 361 perspective. 2018. Accessible at: [https://www.kennisnetwerkcva.nl/news\\_cats/kwaliteitscriteria-cva-](https://www.kennisnetwerkcva.nl/news_cats/kwaliteitscriteria-cva-zorg-geformuleerd-vanuit-patientperspectief/)  
15 362 [zorg-geformuleerd-vanuit-patientperspectief/](https://www.kennisnetwerkcva.nl/news_cats/kwaliteitscriteria-cva-zorg-geformuleerd-vanuit-patientperspectief/).
- 16 363 27. Pollock A, St George B, Fenton M, Firkins L. Top 10 research priorities relating to life after  
17 364 stroke--consensus from stroke survivors, caregivers, and health professionals. *Int. J. Stroke*.  
18 365 2014;9(3):313-20.
- 19 366 28. Party ISW, Henssge U, Hoffman A, et al. National sentinel stroke audit 2010 round 7. London,  
20 367 UK: Royal College of Physicians of London. 2011.
- 21 368 29. Taylor GH, Broomfield NM. Cognitive Assessment and Rehabilitation Pathway for Stroke  
22 369 (CARPS). *Top. Stroke Rehabil*. 2013;20(3):270-82.
- 23 370 30. Fens M, van Heugten CM, Beusmans G, Metsemakers J, Kester A, Limburg M. Effect of a  
24 371 stroke-specific follow-up care model on the quality of life of stroke patients and caregivers: A  
25 372 controlled trial. *J. Rehabil. Med*. 2014;46(1):7-15.

373 Table 1. Screening for cognitive problems after TIA and ischemic stroke

| Item                                                                          | Answer options                                         | n  | (%)  | University hospital (n = 7) | General hospital (n = 45) |
|-------------------------------------------------------------------------------|--------------------------------------------------------|----|------|-----------------------------|---------------------------|
| 1. Are patients screened for cognitive problems?                              | Always                                                 | 8  | (15) | 0                           | 8                         |
|                                                                               | Mostly                                                 | 23 | (44) | 5                           | 18                        |
|                                                                               | Sometimes                                              | 19 | (37) | 2                           | 17                        |
|                                                                               | Never                                                  | 2  | (4)  | 0                           | 2                         |
| 2. Are validated screening instruments used? *                                | Yes                                                    | 42 | (84) | 7                           | 35                        |
|                                                                               | No                                                     | 8  | (16) | 0                           | 8                         |
| 3. Which screening instrument(s) is / are used?<br>† ‡                        | MoCA                                                   | 35 | (83) | 6                           | 29                        |
|                                                                               | MMSE                                                   | 21 | (50) | 3                           | 18                        |
|                                                                               | CLCE-24                                                | 6  | (14) | 2                           | 4                         |
|                                                                               | Other §                                                | 4  | (9)  | 0                           | 4                         |
| 4. When does screening take place? * ‡                                        | During hospital admission                              | 31 | (62) | 5                           | 26                        |
|                                                                               | < 1 week after discharge                               | 2  | (4)  | 0                           | 2                         |
|                                                                               | 1 – 4 weeks after discharge                            | 5  | (10) | 1                           | 4                         |
|                                                                               | 4 – 8 weeks after discharge                            | 19 | (38) | 3                           | 16                        |
|                                                                               | >8 weeks after discharge                               | 14 | (28) | 2                           | 12                        |
| 5. Do patients receive information about possible cognitive problems?         | Always                                                 | 15 | (28) | 2                           | 13                        |
|                                                                               | Mostly                                                 | 25 | (48) | 2                           | 23                        |
|                                                                               | Sometimes                                              | 12 | (23) | 3                           | 9                         |
|                                                                               | Never                                                  | 0  | (0)  | 0                           | 0                         |
| 6. Do patients receive written information about possible cognitive problems? | Always                                                 | 13 | (25) | 2                           | 11                        |
|                                                                               | Mostly                                                 | 13 | (25) | 1                           | 12                        |
|                                                                               | Sometimes                                              | 7  | (14) | 1                           | 6                         |
|                                                                               | Never                                                  | 19 | (37) | 3                           | 16                        |
| 7. Do caregivers receive information about possible cognitive problems?       | Always                                                 | 13 | (25) | 0                           | 13                        |
|                                                                               | Mostly                                                 | 23 | (44) | 4                           | 19                        |
|                                                                               | Sometimes                                              | 15 | (29) | 3                           | 12                        |
|                                                                               | Never                                                  | 1  | (2)  | 0                           | 1                         |
| 8. Reasons for referral to specialized care ‡                                 | Cognitive complaints                                   | 36 | (69) | 5                           | 31                        |
|                                                                               | Clinical suspicion of cognitive disorders              | 36 | (69) | 5                           | 31                        |
|                                                                               | Abnormal screening results                             | 30 | (58) | 3                           | 27                        |
|                                                                               | Abnormal results during neuropsychological examination | 14 | (27) | 2                           | 12                        |
| 9. Who is the treating physician for cognitive                                | Neurologist                                            | 35 | (67) | 4                           | 31                        |
|                                                                               | Resident in neurology                                  | 3  | (6)  | 1                           | 2                         |

|                                                                                                       |                                           |    |      |   |    |
|-------------------------------------------------------------------------------------------------------|-------------------------------------------|----|------|---|----|
| <b>problems? ‡</b>                                                                                    | Nurse practitioner or physician assistant | 23 | (55) | 3 | 20 |
|                                                                                                       | Rehabilitation physician                  | 30 | (58) | 5 | 25 |
|                                                                                                       | Psychologist                              | 6  | (12) | 0 | 6  |
|                                                                                                       | Geriatrician                              | 8  | (15) | 1 | 7  |
|                                                                                                       | Nursing home doctor                       | 6  | (12) | 1 | 5  |
|                                                                                                       | General practitioner                      | 16 | (31) | 2 | 14 |
|                                                                                                       | Occupational therapist                    | 5  | (10) | 0 | 5  |
| <b>10. Does your hospital have a protocol or guideline for follow-up care for cognitive problems?</b> | Yes                                       | 12 | (23) | 2 | 1  |
|                                                                                                       | No                                        | 39 | (75) | 5 | 44 |
|                                                                                                       | Missing                                   | 1  | (2)  | 0 |    |

374 MoCA: Montreal Cognitive Assessment; MMSE: Mini-Mental State Examination; CLCE-24:

375 Checklist for Cognitive and Emotional Consequences following Stroke.

376 \* Items 2 and 4 were only asked if item 1 had been marked 'Always', 'Mostly' or 'Sometimes'.

377 † Item 3 was only asked when item 2 had been marked 'Yes'.

378 ‡ These items allowed multiple answers and were analysed accordingly, see 'Statistical Analysis' paragraph; consequently, the sum of the percentages is not 100%.

380 § Other screening instruments included the Cambridge Cognitive Examination (CAMCOG) (n = 1),  
 381 the Symbol Digit Modalities Test (SDMT) (n = 1), the Assessment tool for long-term Consequences  
 382 After Stroke (SIGEB) (n = 1) and a neuropsychological examination (n = 1).

383 Table 2. Screening for emotional problems after TIA and ischemic stroke

| Item                                                                          | Answer options                            | n  | (%)  | University hospital | General hospital |
|-------------------------------------------------------------------------------|-------------------------------------------|----|------|---------------------|------------------|
| 1. Are patients screened for emotional problems?                              | Always                                    | 10 | (19) | 1                   | 9                |
|                                                                               | Mostly                                    | 19 | (37) | 3                   | 16               |
|                                                                               | Sometimes                                 | 20 | (39) | 3                   | 17               |
|                                                                               | Never                                     | 3  | (6)  | 0                   | 3                |
| 2. Are validated screening instruments used? *                                | Yes                                       | 31 | (63) | 6                   | 25               |
|                                                                               | No                                        | 18 | (37) | 1                   | 17               |
| 3. Which screening instrument(s) is / are used? † ‡                           | HADS                                      | 27 | (87) | 6                   | 21               |
|                                                                               | CLCE-24                                   | 4  | (13) | 0                   | 4                |
|                                                                               | HDRS                                      | 1  | (3)  | 0                   | 1                |
|                                                                               | BDI                                       | 1  | (3)  | 0                   | 1                |
|                                                                               | SIGEB                                     | 2  | (6)  | 0                   | 2                |
| 4. When does screening take place? * †                                        | During hospital admission                 | 14 | (29) | 0                   | 14               |
|                                                                               | < 1 week after discharge                  | 1  | (2)  | 0                   | 1                |
|                                                                               | 1 – 4 weeks after discharge               | 13 | (27) | 4                   | 9                |
|                                                                               | 4 – 8 weeks after discharge               | 21 | (43) | 1                   | 20               |
|                                                                               | >8 weeks after discharge                  | 12 | (25) | 2                   | 10               |
| 5. Do patients receive information about possible emotional problems?         | Always                                    | 11 | (21) | 1                   | 10               |
|                                                                               | Mostly                                    | 21 | (40) | 3                   | 18               |
|                                                                               | Sometimes                                 | 18 | (35) | 3                   | 15               |
|                                                                               | Never                                     | 2  | (4)  | 0                   | 2                |
| 6. Do patients receive written information about possible emotional problems? | Always                                    | 9  | (17) | 0                   | 9                |
|                                                                               | Mostly                                    | 12 | (23) | 2                   | 10               |
|                                                                               | Sometimes                                 | 12 | (23) | 3                   | 9                |
|                                                                               | Never                                     | 19 | (37) | 2                   | 17               |
| 7. Do caregivers receive information about possible emotional problems?       | Always                                    | 8  | (15) | 0                   | 8                |
|                                                                               | Mostly                                    | 13 | (25) | 3                   | 10               |
|                                                                               | Sometimes                                 | 12 | (23) | 2                   | 10               |
|                                                                               | Never                                     | 19 | (37) | 2                   | 17               |
| 8. Reason for referral to specialized care ‡                                  | Emotional complaints                      | 37 | (71) | 5                   | 32               |
|                                                                               | Clinical suspicion of emotional disorders | 31 | (60) | 4                   | 27               |
|                                                                               | Abnormal screening results                | 14 | (27) | 2                   | 12               |
| 9. Who is the treating physician                                              | Neurologist                               | 30 | (58) | 5                   | 25               |



|            |                                                                                                   |                                           |    |      |   |    |
|------------|---------------------------------------------------------------------------------------------------|-------------------------------------------|----|------|---|----|
|            | <b>for emotional problems? ‡</b>                                                                  | Resident in neurology                     | 3  | (6)  | 1 | 2  |
|            |                                                                                                   | Nurse practitioner or physician assistant | 27 | (52) | 4 | 23 |
|            |                                                                                                   | Rehabilitation physician                  | 23 | (44) | 3 | 20 |
|            |                                                                                                   | Psychiatrist                              | 1  | (2)  | 0 | 1  |
|            |                                                                                                   | Psychologist                              | 14 | (27) | 1 | 13 |
|            |                                                                                                   | Geriatrician                              | 5  | (10) | 1 | 4  |
|            |                                                                                                   | General practitioner                      | 16 | (31) | 1 | 15 |
| <b>10.</b> | <b>Does your hospital have a protocol or guideline for follow-up care for emotional problems?</b> | Yes                                       | 9  | (17) | 2 | 7  |
|            |                                                                                                   | No                                        | 42 | (81) | 5 | 37 |
|            |                                                                                                   | Missing                                   | 1  | (2)  | 0 | 1  |

384 HADS: Hospital Anxiety and Depression Scale; CLCE-24: Checklist for Cognitive and Emotional  
 385 Consequences following Stroke; HDRS: Hamilton Depression Rating Scale; BDI: Beck Depression  
 386 Inventory; SIGEB: Assessment tool for long-term Consequences After Stroke  
 387 (*'Signaleringsinstrument voor de lange termijn Gevolgen van een Beroerte'*)(30)

388 \* Items 2 and 4 were only asked when item 1 had been marked 'Always', 'Mostly' or 'Sometimes'.

389 † Item 3 was only asked when item 2 had been marked 'Yes'.

390 ‡ These items allowed multiple answers and were analysed accordingly, see 'Statistical Analysis'  
 391 paragraph; consequently, the sum of the percentages is not 100%.

392

393 **Table 3. Characteristics of respondents and non-respondents**

| Characteristic                                                               | Respondents, n=<br>52 | Non-respondents, n<br>= 26 |
|------------------------------------------------------------------------------|-----------------------|----------------------------|
| Female sex (%)                                                               | 19 (37)               | -                          |
| Age, median (interquartile range)                                            | 45 (40 – 57)          | -                          |
| Neurologist (%)                                                              | 49 (94)               | -                          |
| Nurse practitioner or physician assistant at the<br>neurology department (%) | 3 (6)                 | -                          |
| Type of hospital                                                             |                       |                            |
| University (%)                                                               | 7 (15)                | 1 (4)                      |
| Large general (%)                                                            | 44 (87)               | 25 (96)                    |
| Small general (%)                                                            | 1 (2)                 | 0 (0)                      |

394

STROBE Statement—Checklist of items that should be included in reports of *cross-sectional studies*

|                           | <b>Item No</b> | <b>Recommendation</b>                                                                                                                                                                |                                                                   |
|---------------------------|----------------|--------------------------------------------------------------------------------------------------------------------------------------------------------------------------------------|-------------------------------------------------------------------|
| <b>Title and abstract</b> | 1              | (a) Indicate the study's design with a commonly used term in the title or the abstract                                                                                               | <b>Page 1 / line 1-3</b>                                          |
|                           |                | (b) Provide in the abstract an informative and balanced summary of what was done and what was found                                                                                  | <b>Page 3 / line 29 – 50</b>                                      |
| <b>Introduction</b>       |                |                                                                                                                                                                                      |                                                                   |
| Background/rationale      | 2              | Explain the scientific background and rationale for the investigation being reported                                                                                                 | <b>Page 4 – 5 / line 69 – 86</b>                                  |
| Objectives                | 3              | State specific objectives, including any prespecified hypotheses                                                                                                                     | <b>Page 5 / line 87 – 93</b>                                      |
| <b>Methods</b>            |                |                                                                                                                                                                                      |                                                                   |
| Study design              | 4              | Present key elements of study design early in the paper                                                                                                                              | <b>Page 6 / line 97 – 98</b>                                      |
| Setting                   | 5              | Describe the setting, locations, and relevant dates, including periods of recruitment, exposure, follow-up, and data collection                                                      | <b>Page 6 - line 97 – 105</b><br><b>Page – 7 / line 116 – 128</b> |
| Participants              | 6              | (a) Give the eligibility criteria, and the sources and methods of selection of participants                                                                                          | <b>Page 6 / line 98 – 105</b>                                     |
| Variables                 | 7              | Clearly define all outcomes, exposures, predictors, potential confounders, and effect modifiers. Give diagnostic criteria, if applicable                                             | <b>Page 6 – 7 – line 112 – 122</b>                                |
| Data sources/ measurement | 8*             | For each variable of interest, give sources of data and details of methods of assessment (measurement). Describe comparability of assessment methods if there is more than one group | <b>Page 6 – 7 / line 112 – 128</b>                                |
| Bias                      | 9              | Describe any efforts to address potential sources of bias                                                                                                                            | <b>Page 11 / line 217 - 225</b>                                   |
| Study size                | 10             | Explain how the study size was arrived at                                                                                                                                            | <b>Page 6 / line 98 - 100</b>                                     |
| Quantitative variables    | 11             | Explain how quantitative variables were handled in the analyses. If applicable, describe which groupings were chosen and why                                                         | <b>Page 7 / line 131 - 137</b>                                    |

|    |                     |     |                                                                                                                                                                                                              |
|----|---------------------|-----|--------------------------------------------------------------------------------------------------------------------------------------------------------------------------------------------------------------|
| 1  |                     |     |                                                                                                                                                                                                              |
| 2  | Statistical methods | 12  | (a) Describe all statistical methods, including those used to control for confounding                                                                                                                        |
| 3  |                     |     |                                                                                                                                                                                                              |
| 4  |                     |     |                                                                                                                                                                                                              |
| 5  |                     |     |                                                                                                                                                                                                              |
| 6  |                     |     | (b) Describe any methods used to examine subgroups and interactions                                                                                                                                          |
| 7  |                     |     | (c) Explain how missing data were addressed                                                                                                                                                                  |
| 8  |                     |     | (d) If applicable, describe analytical methods taking account of sampling strategy                                                                                                                           |
| 9  |                     |     |                                                                                                                                                                                                              |
| 10 |                     |     | (e) Describe any sensitivity analyses                                                                                                                                                                        |
| 11 |                     |     |                                                                                                                                                                                                              |
| 12 |                     |     |                                                                                                                                                                                                              |
| 13 | <b>Results</b>      |     |                                                                                                                                                                                                              |
| 14 | Participants        | 13* | (a) Report numbers of individuals at each stage of study—eg numbers potentially eligible, examined for eligibility, confirmed eligible, included in the study, completing follow-up, and analysed            |
| 15 |                     |     |                                                                                                                                                                                                              |
| 16 |                     |     |                                                                                                                                                                                                              |
| 17 |                     |     |                                                                                                                                                                                                              |
| 18 |                     |     |                                                                                                                                                                                                              |
| 19 |                     |     |                                                                                                                                                                                                              |
| 20 |                     |     | (b) Give reasons for non-participation at each stage                                                                                                                                                         |
| 21 |                     |     |                                                                                                                                                                                                              |
| 22 |                     |     | (c) Consider use of a flow diagram                                                                                                                                                                           |
| 23 |                     |     |                                                                                                                                                                                                              |
| 24 | Descriptive data    | 14* | (a) Give characteristics of study participants (eg demographic, clinical, social) and information on exposures and potential confounders                                                                     |
| 25 |                     |     |                                                                                                                                                                                                              |
| 26 |                     |     |                                                                                                                                                                                                              |
| 27 |                     |     |                                                                                                                                                                                                              |
| 28 |                     |     |                                                                                                                                                                                                              |
| 29 |                     |     |                                                                                                                                                                                                              |
| 30 |                     |     | (b) Indicate number of participants with missing data for each variable of interest                                                                                                                          |
| 31 |                     |     |                                                                                                                                                                                                              |
| 32 |                     |     |                                                                                                                                                                                                              |
| 33 | Outcome data        | 15* | Report numbers of outcome events or summary measures                                                                                                                                                         |
| 34 |                     |     |                                                                                                                                                                                                              |
| 35 |                     |     |                                                                                                                                                                                                              |
| 36 |                     |     |                                                                                                                                                                                                              |
| 37 |                     |     |                                                                                                                                                                                                              |
| 38 |                     |     |                                                                                                                                                                                                              |
| 39 | Main results        | 16  | (a) Give unadjusted estimates and, if applicable, confounder-adjusted estimates and their precision (eg, 95% confidence interval). Make clear which confounders were adjusted for and why they were included |
| 40 |                     |     |                                                                                                                                                                                                              |
| 41 |                     |     |                                                                                                                                                                                                              |
| 42 |                     |     |                                                                                                                                                                                                              |
| 43 |                     |     |                                                                                                                                                                                                              |
| 44 |                     |     |                                                                                                                                                                                                              |
| 45 |                     |     | (b) Report category boundaries when continuous variables were categorized                                                                                                                                    |
| 46 |                     |     |                                                                                                                                                                                                              |
| 47 |                     |     | (c) If relevant, consider translating estimates of relative risk into absolute risk for a meaningful time period                                                                                             |
| 48 |                     |     |                                                                                                                                                                                                              |
| 49 |                     |     |                                                                                                                                                                                                              |
| 50 | Other analyses      | 17  | Report other analyses done—eg analyses of subgroups and interactions, and sensitivity analyses                                                                                                               |
| 51 |                     |     |                                                                                                                                                                                                              |
| 52 |                     |     |                                                                                                                                                                                                              |
| 53 | <b>Discussion</b>   |     |                                                                                                                                                                                                              |
| 54 | Key results         | 18  | Summarise key results with reference to study objectives                                                                                                                                                     |
| 55 |                     |     |                                                                                                                                                                                                              |
| 56 |                     |     |                                                                                                                                                                                                              |
| 57 |                     |     |                                                                                                                                                                                                              |
| 58 |                     |     |                                                                                                                                                                                                              |
| 59 | Limitations         | 19  | Discuss limitations of the study, taking into account sources of potential bias or imprecision. Discuss both direction and magnitude of any                                                                  |
| 60 |                     |     |                                                                                                                                                                                                              |

1  
2  
3  
4  
5  
6  
7  
8  
9  
10  
11  
12  
13  
14  
15  
16  
17  
18  
19  
20  
21  
22  
23  
24  
25  
26  
27  
28  
29  
30  
31  
32  
33  
34  
35  
36  
37  
38  
39  
40  
41  
42  
43  
44  
45  
46  
47  
48  
49  
50  
51  
52  
53  
54  
55  
56  
57  
58  
59  
60

|                          |    |                                                                                                                                                                            |                                        |
|--------------------------|----|----------------------------------------------------------------------------------------------------------------------------------------------------------------------------|----------------------------------------|
|                          |    | potential bias                                                                                                                                                             | 217 -<br>225                           |
| Interpretation           | 20 | Give a cautious overall interpretation of results considering objectives, limitations, multiplicity of analyses, results from similar studies, and other relevant evidence | Page 11<br>– 13 /<br>line 226<br>– 278 |
| Generalisability         | 21 | Discuss the generalisability (external validity) of the study results                                                                                                      | Page 11<br>/ line<br>217 -<br>225      |
| <b>Other information</b> |    |                                                                                                                                                                            |                                        |
| Funding                  | 22 | Give the source of funding and the role of the funders for the present study and, if applicable, for the original study on which the present article is based              | Page 14<br>/ line<br>291 -<br>292      |

\*Give information separately for exposed and unexposed groups.

**Note:** An Explanation and Elaboration article discusses each checklist item and gives methodological background and published examples of transparent reporting. The STROBE checklist is best used in conjunction with this article (freely available on the Web sites of PLoS Medicine at <http://www.plosmedicine.org/>, Annals of Internal Medicine at <http://www.annals.org/>, and Epidemiology at <http://www.epidem.com/>). Information on the STROBE Initiative is available at [www.strobe-statement.org](http://www.strobe-statement.org).
